# Supplementary figures and images for: A general theory on frequency and time-frequency analysis of irregularly sampled time series based on projection methods. II. Extension to time-frequency analysis
Source: Copernicus journal article supplement (doi:10.5194/npg-2017-27), 2017-07-04

Wavelet scalogram - SNEZ with matrix G

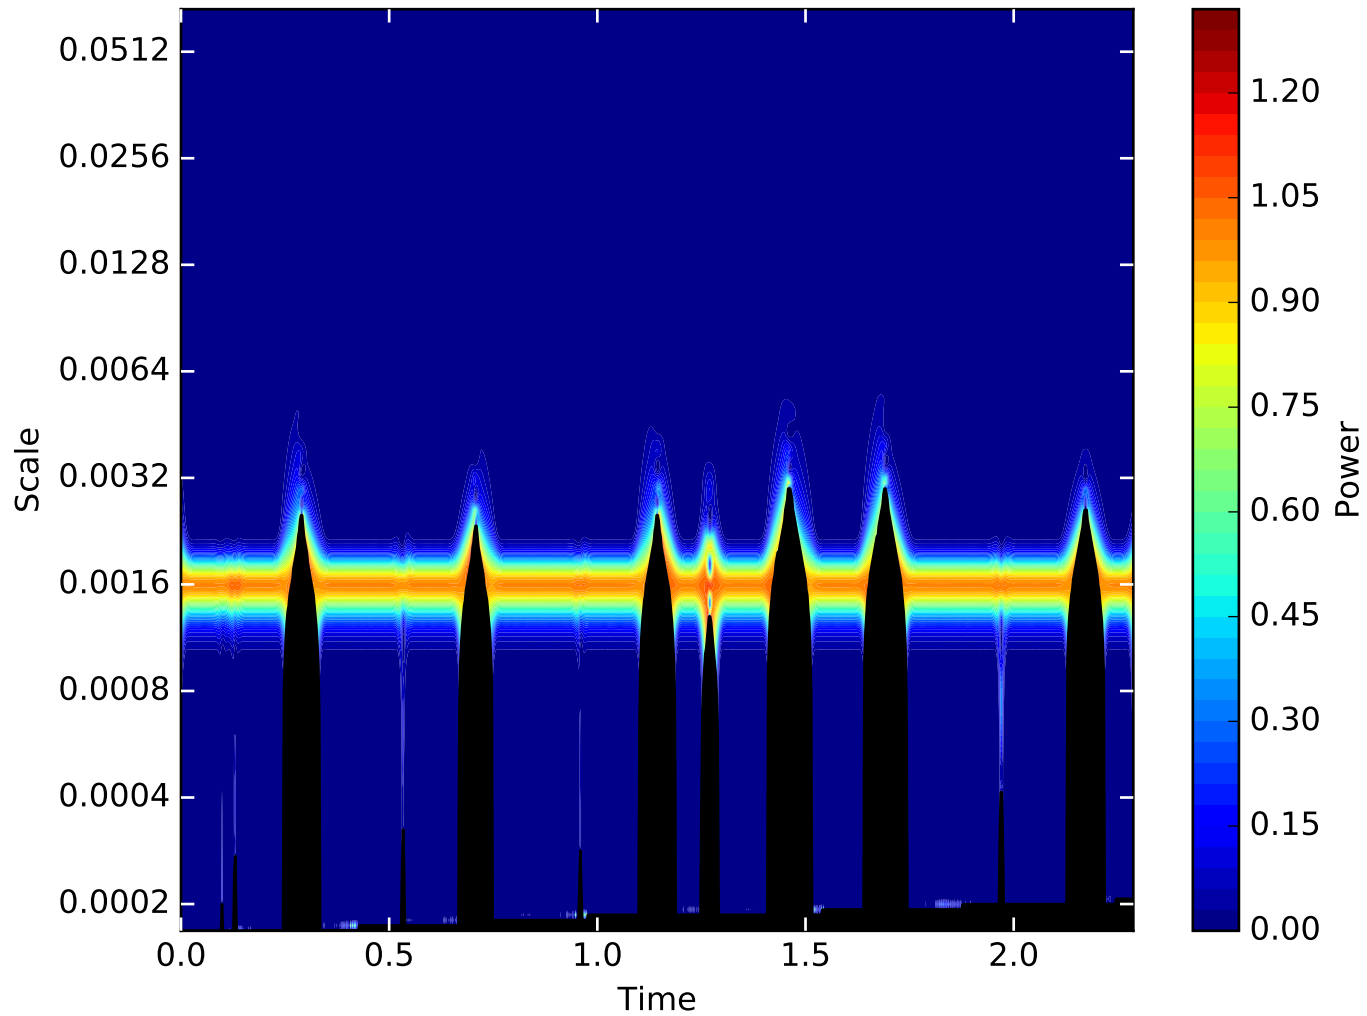

Supplement: Supplementary file 1 [file npg-2017-27-supplement.zip]

Computing times

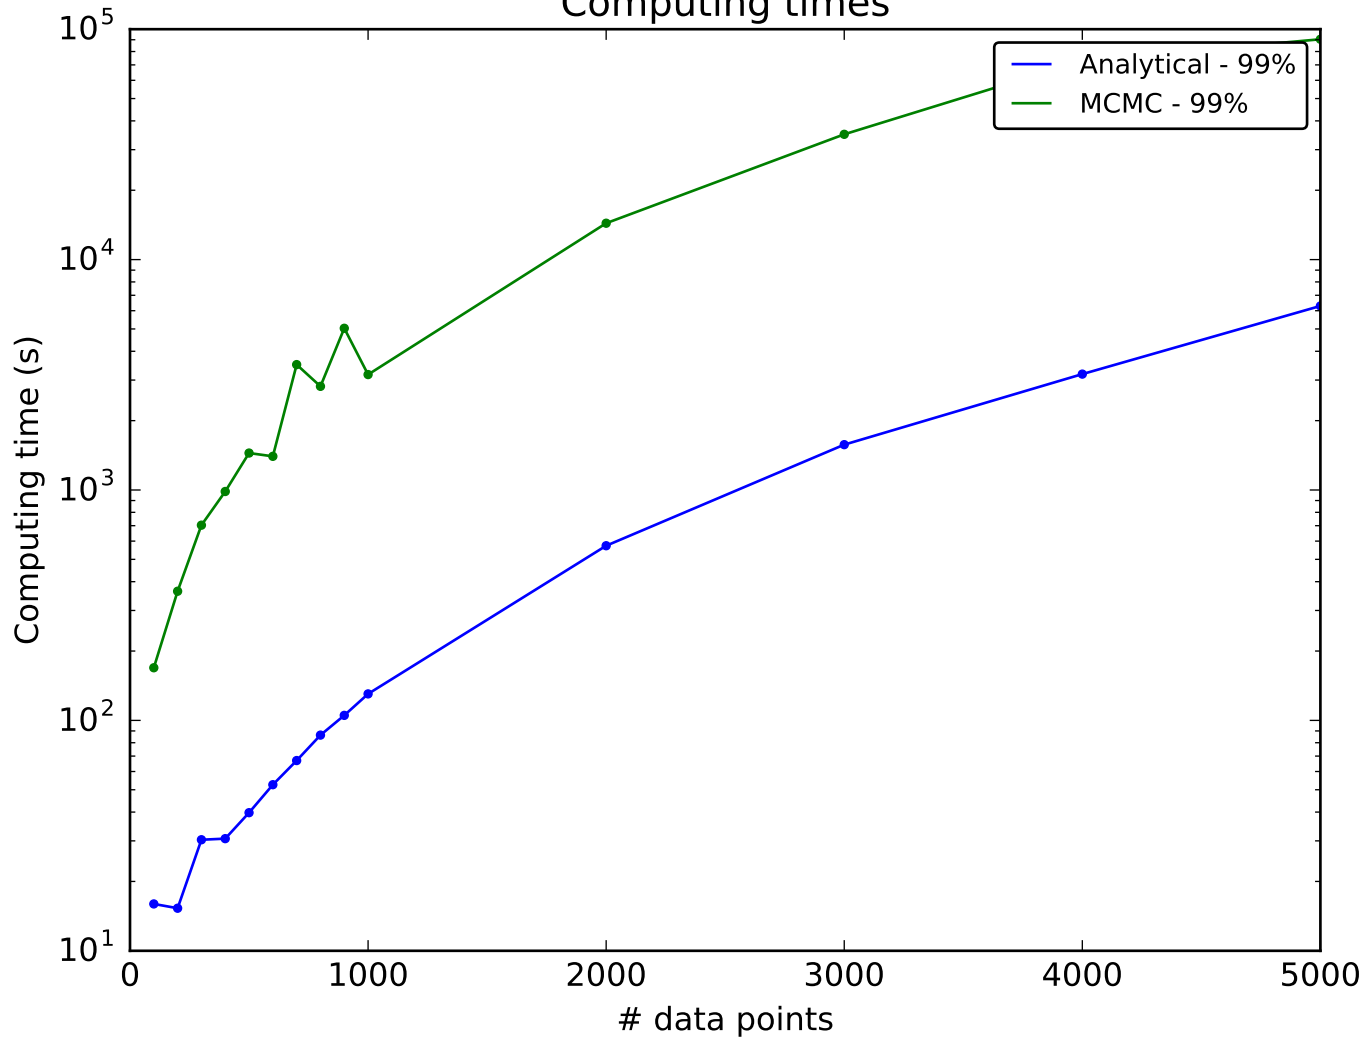

Supplement: Supplementary file 2 [file npg-2017-27-supplement.zip]

Wavelet scalogram - SNEZ with matrix H

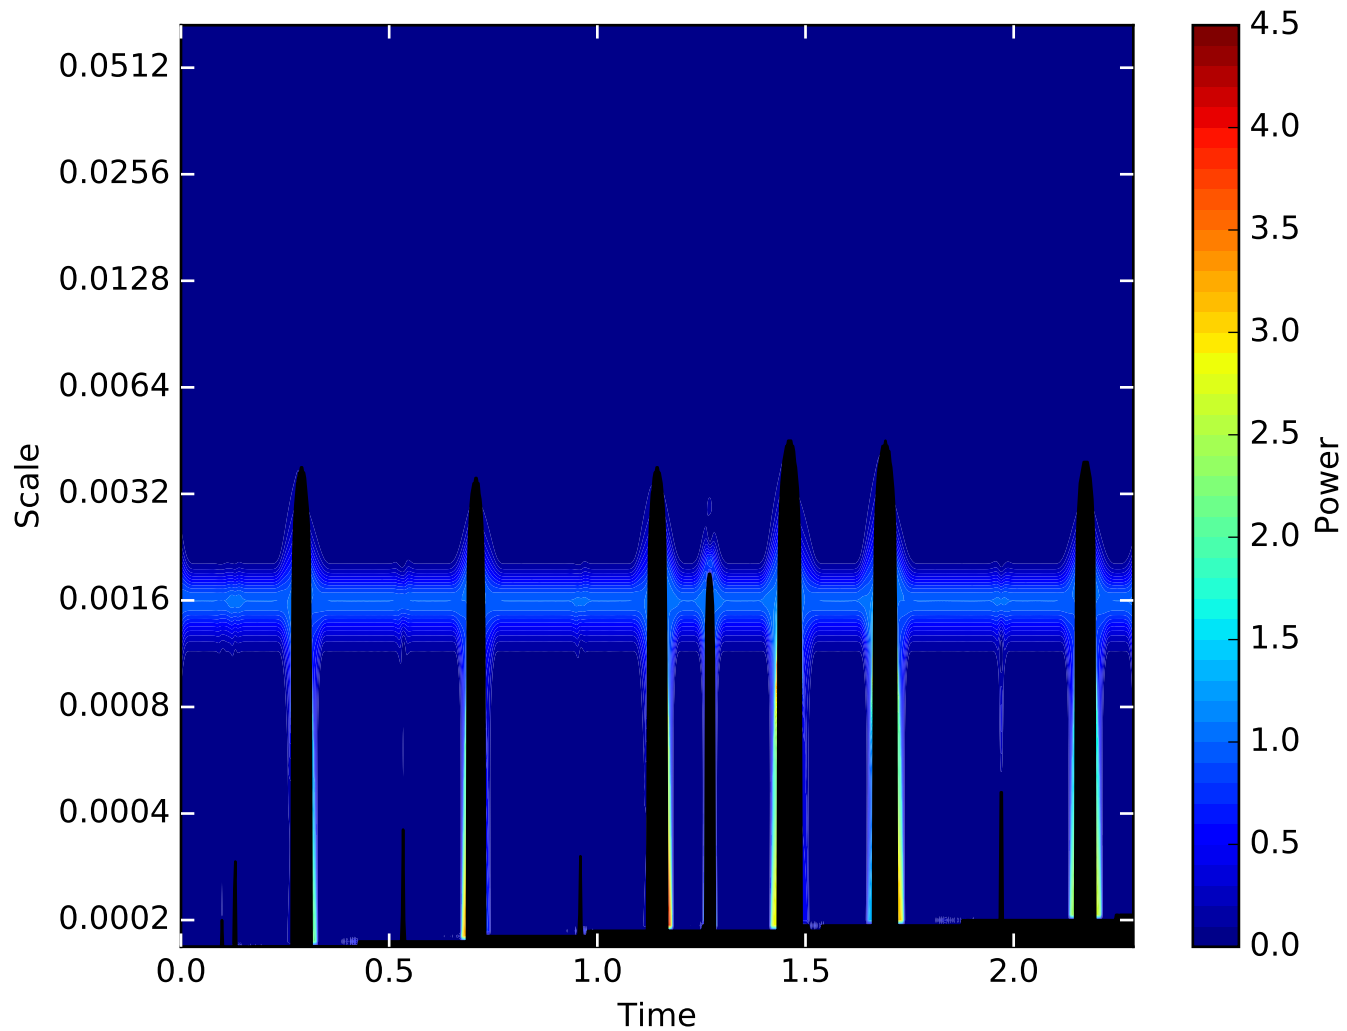

Supplement: Supplementary file 3 [file npg-2017-27-supplement.zip]

Computing times

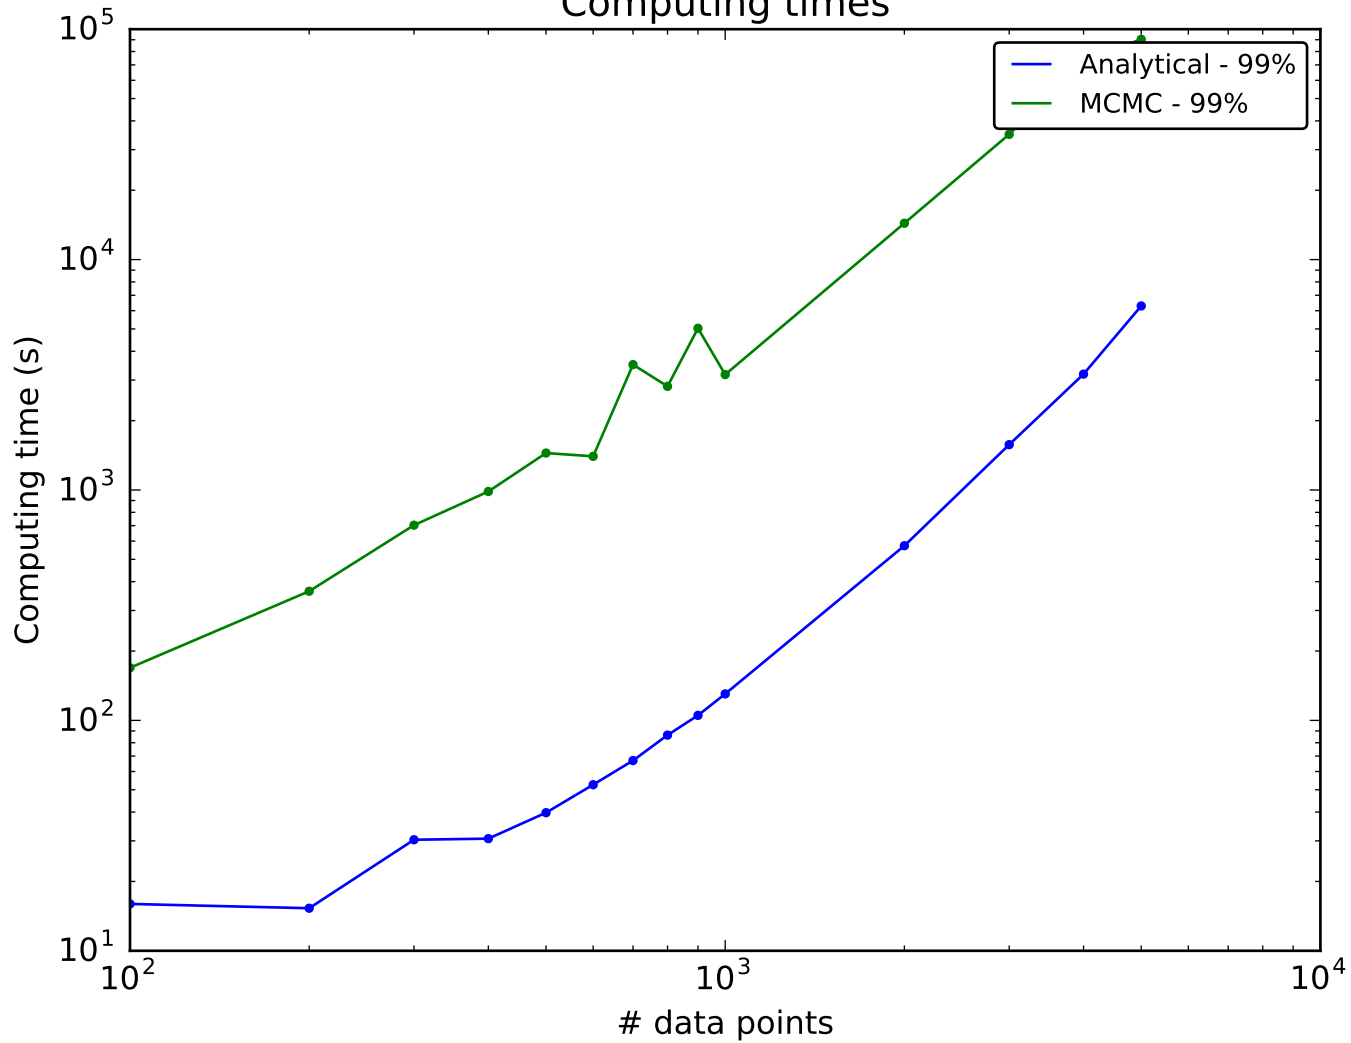

Supplement: Supplementary file 4 [file npg-2017-27-supplement.zip]

Wavelet scalogram & 95.0 % confidence levels  
No interpolation

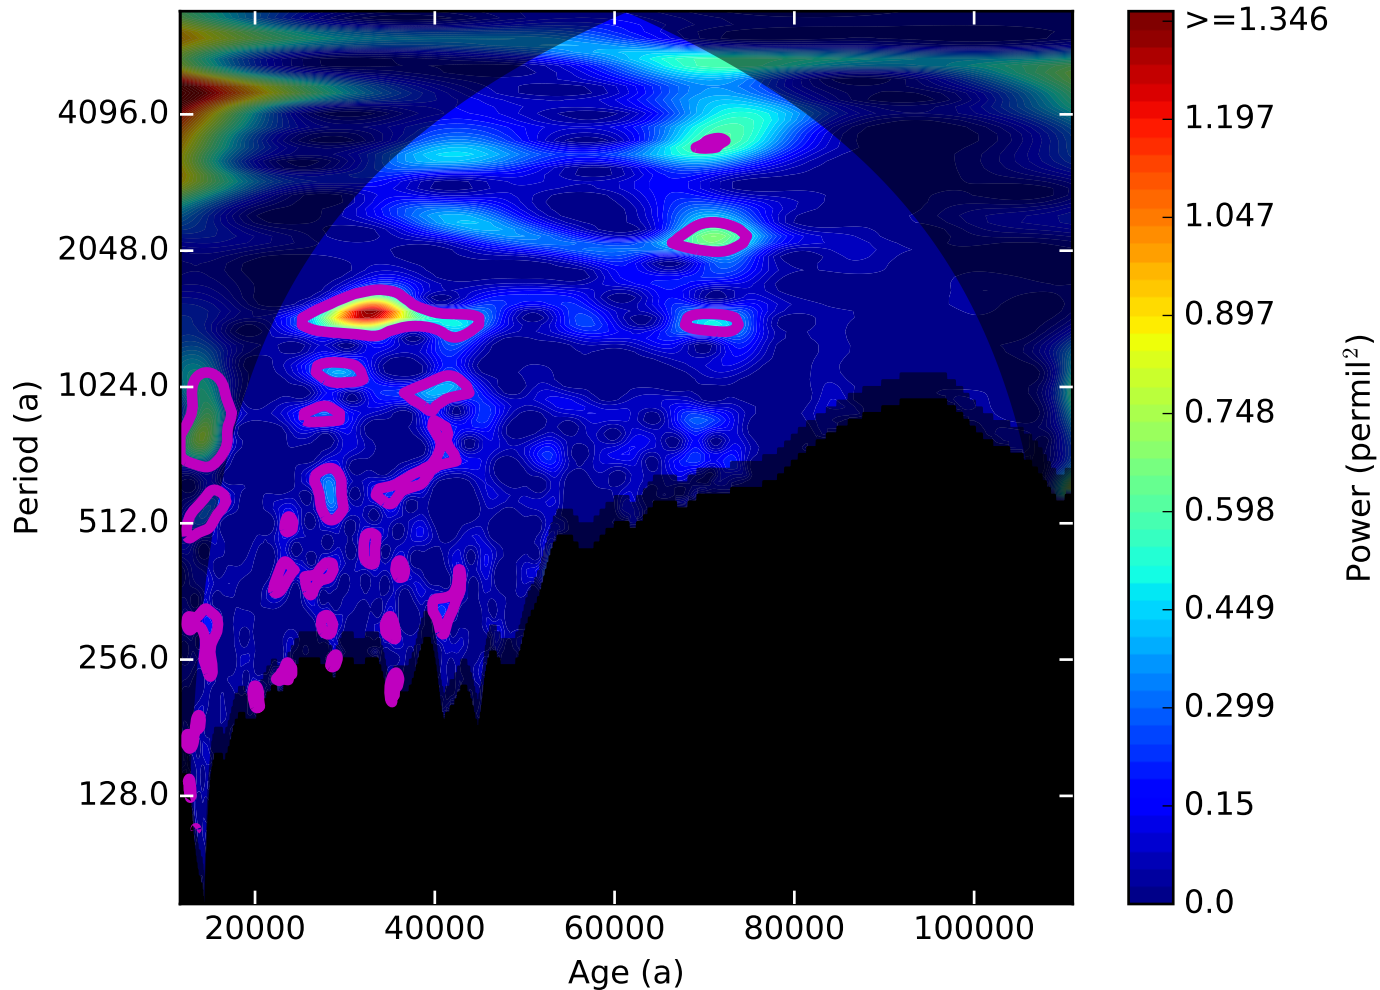

Supplement: Supplementary file 5 [file npg-2017-27-supplement.zip]

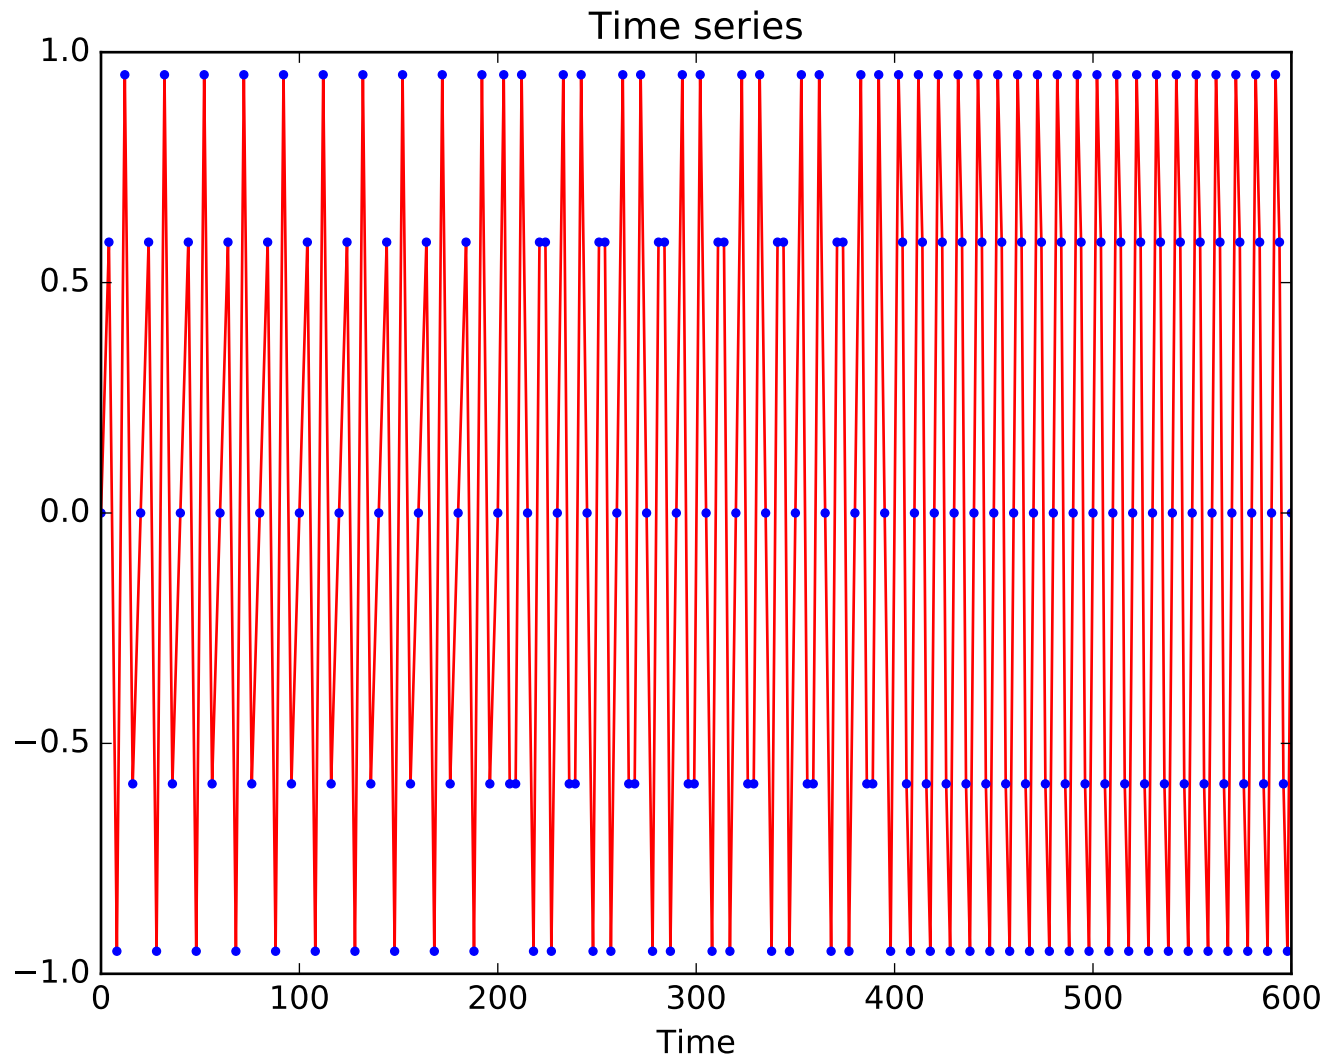

Supplement: Supplementary file 6 [file npg-2017-27-supplement.zip]

Time step in function of Time

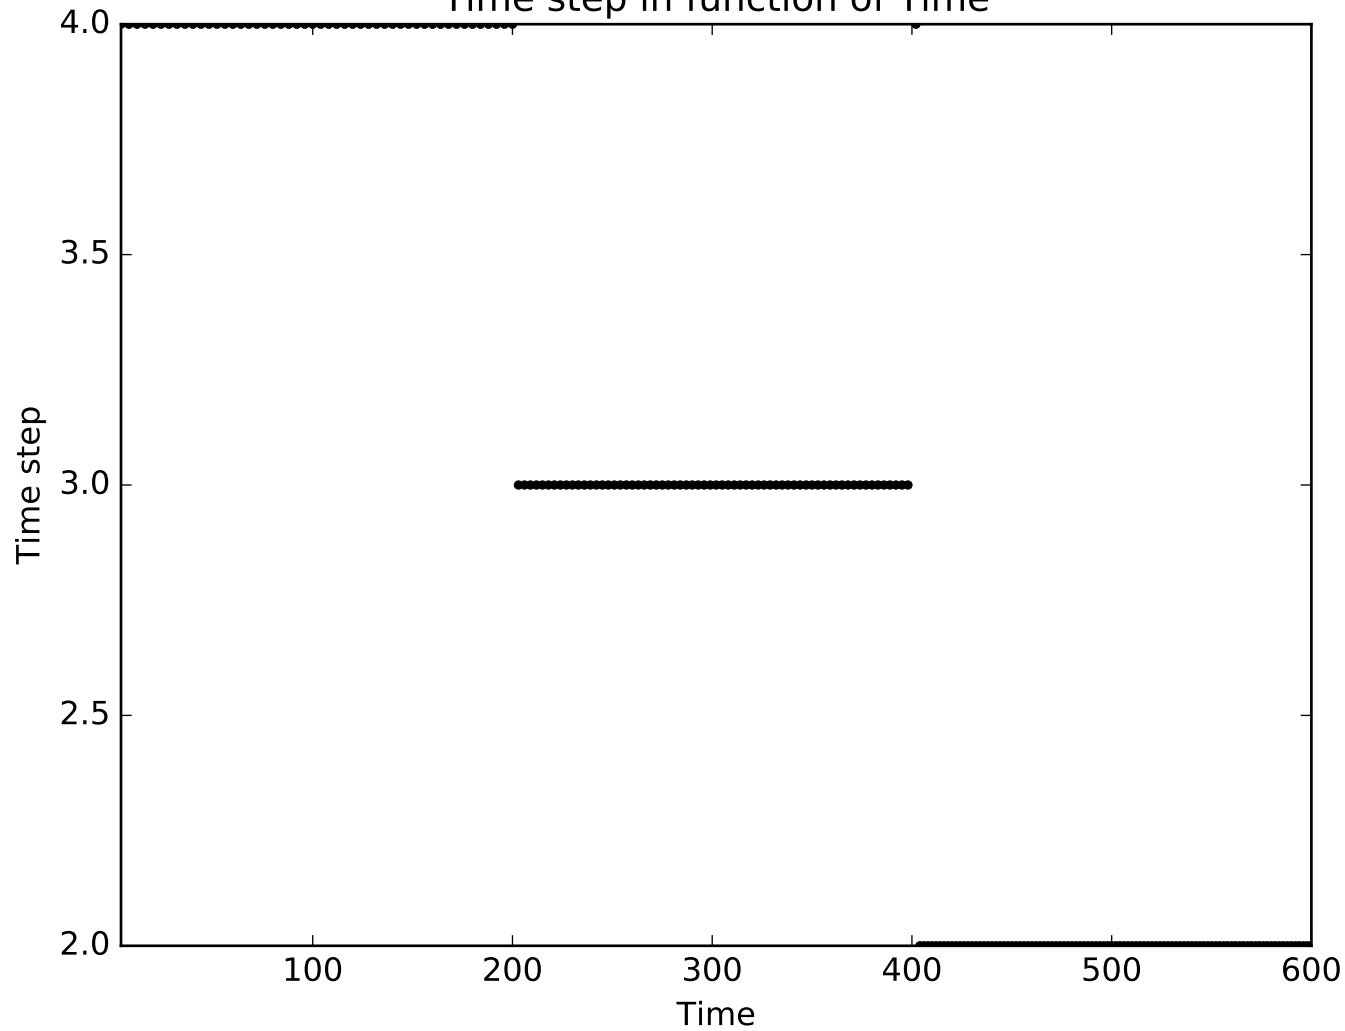

Supplement: Supplementary file 7 [file npg-2017-27-supplement.zip]

Wavelet scalogram - With refinement of the SNEZ

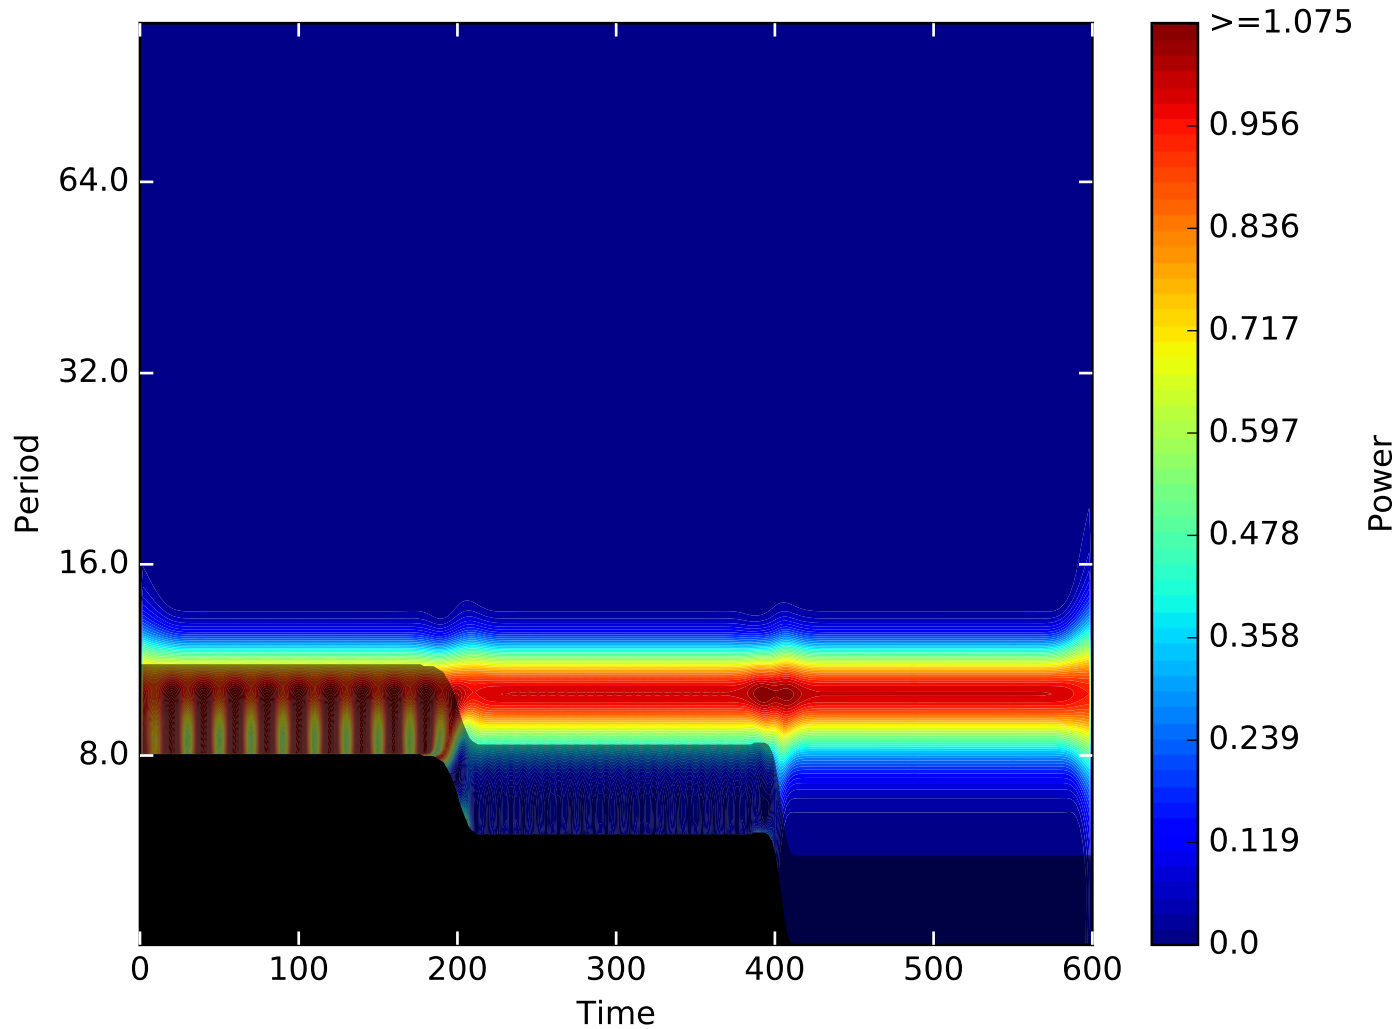

Supplement: Supplementary file 8 [file npg-2017-27-supplement.zip]

Wavelet scalogram - No refinement of the SNEZ

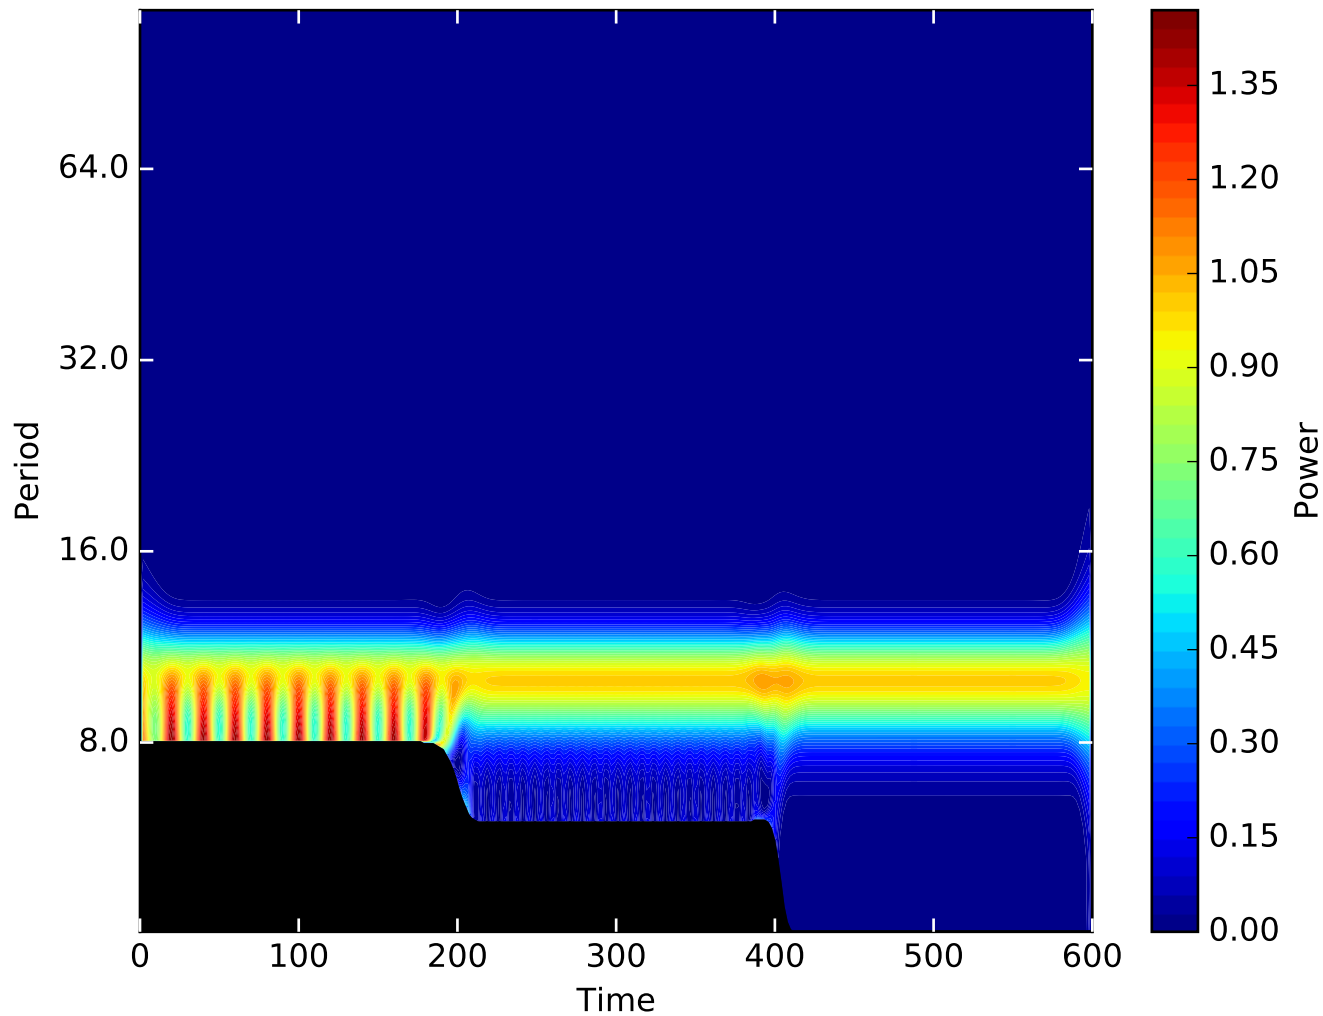

Supplement: Supplementary file 9 [file npg-2017-27-supplement.zip]

# Convergence of the analytical percentiles

— 95.0%

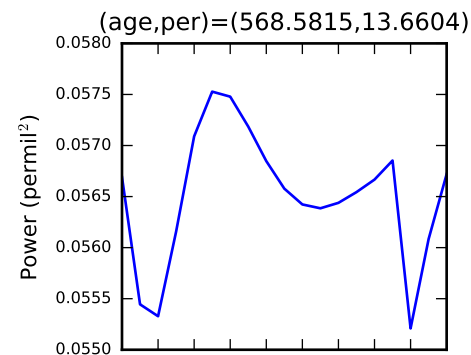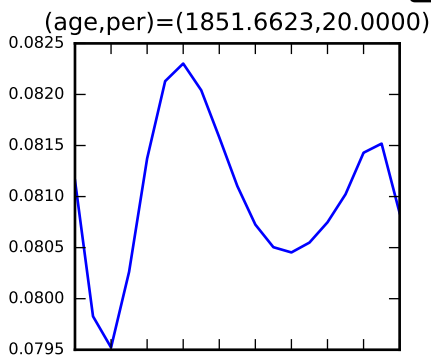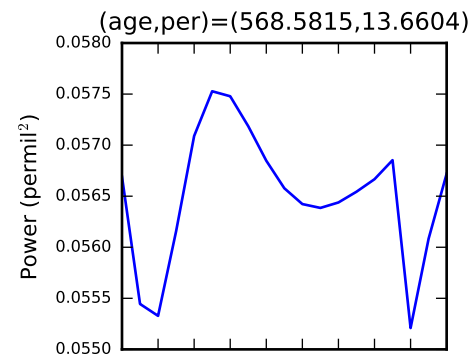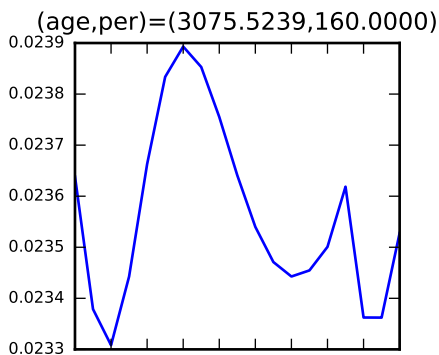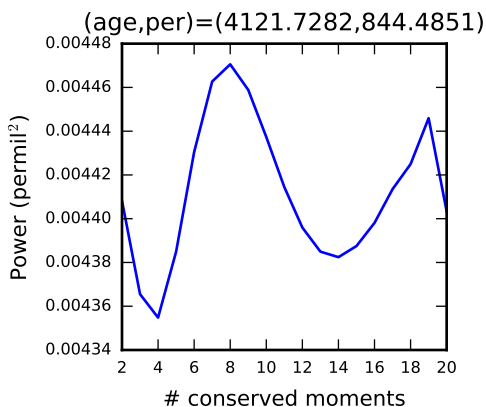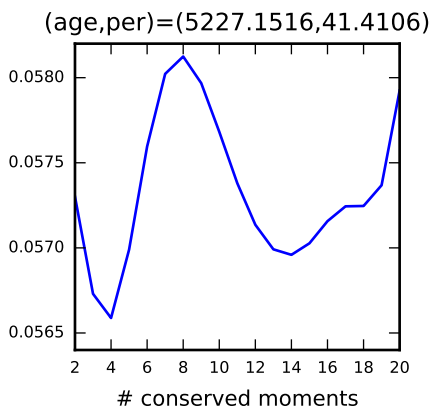

Supplement: Supplementary file 10 [file npg-2017-27-supplement.zip]

Wavelet amplitude - With refinement of the SNEZ

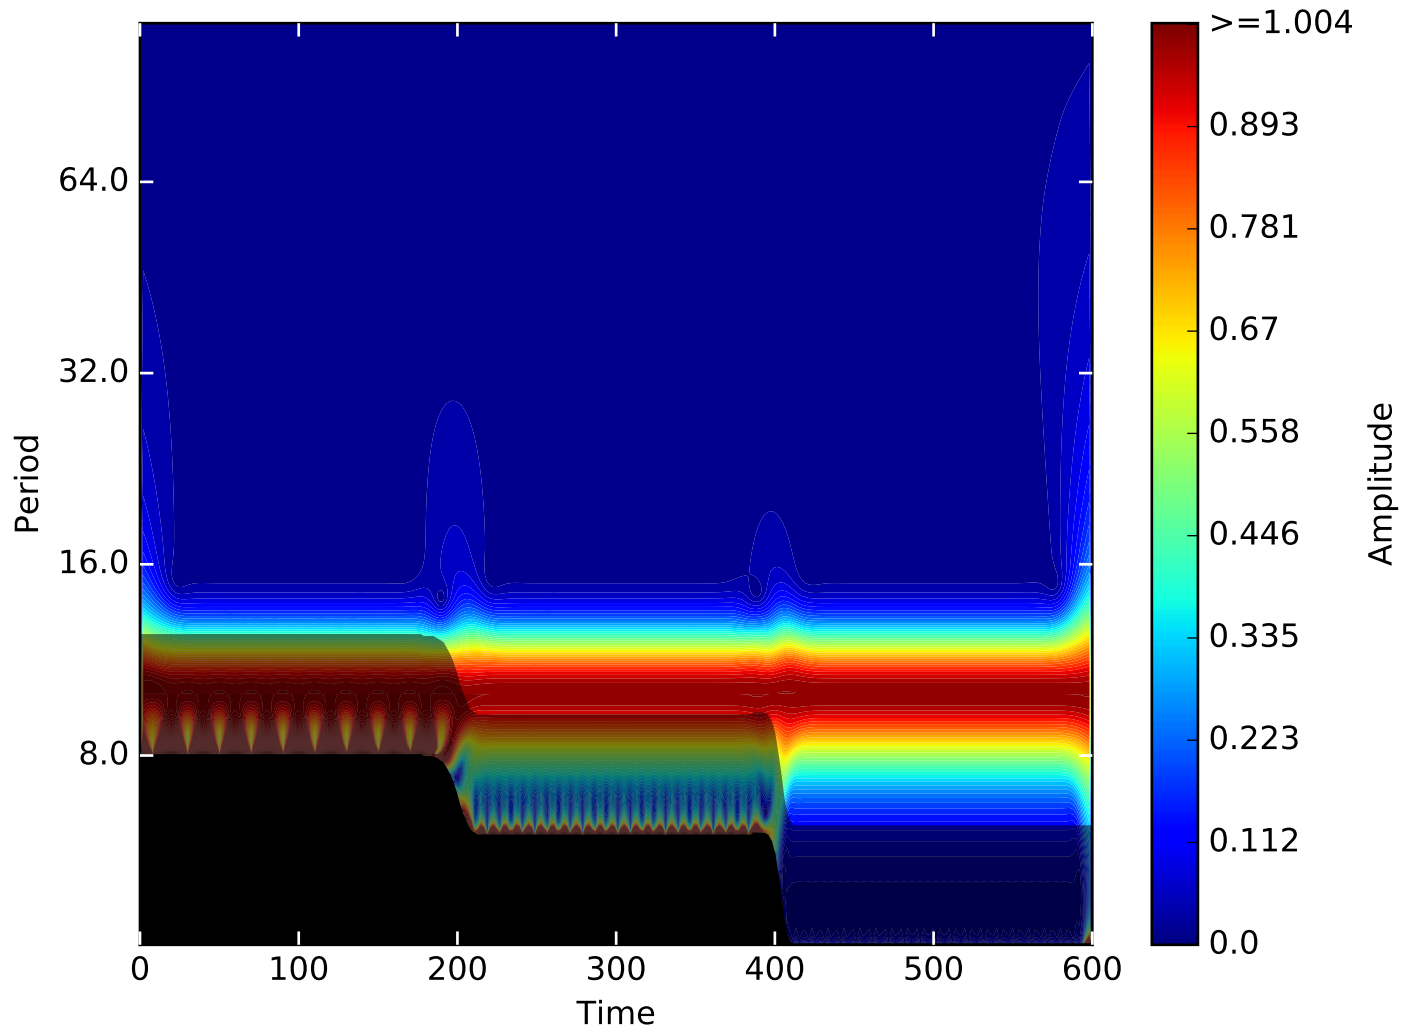

Supplement: Supplementary file 11 [file npg-2017-27-supplement.zip]

$\delta^{18}O$  (permil)

Filtered signal in the band [35 kyr, 45 kyr]

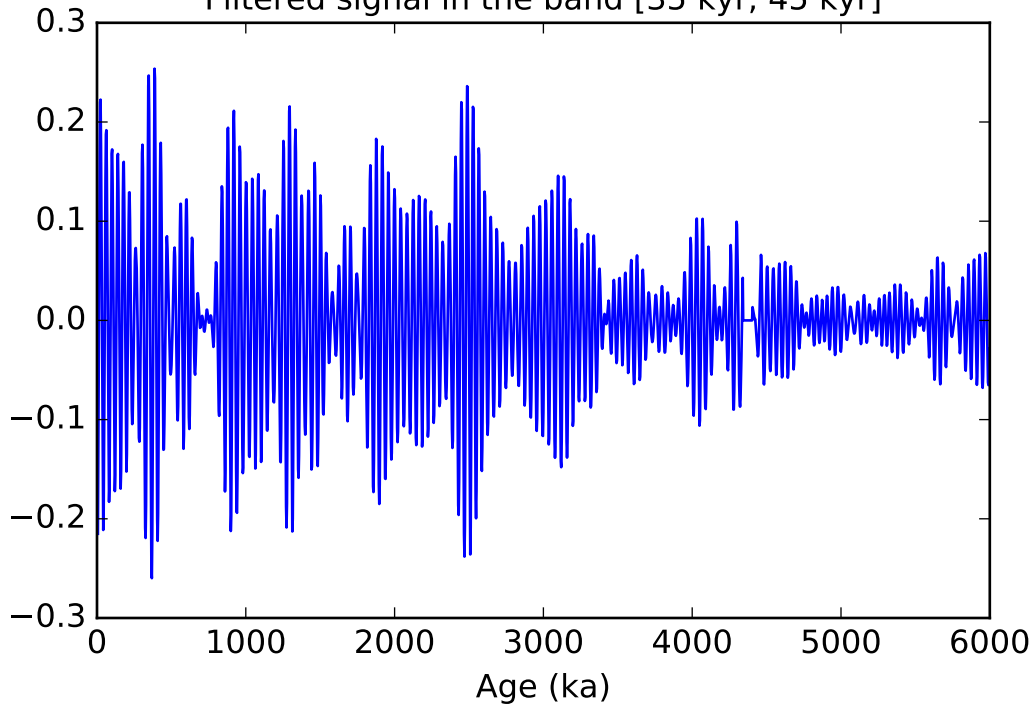

Supplement: Supplementary file 12 [file npg-2017-27-supplement.zip]

Wavelet scalogram - SNEZ with matrices G and H

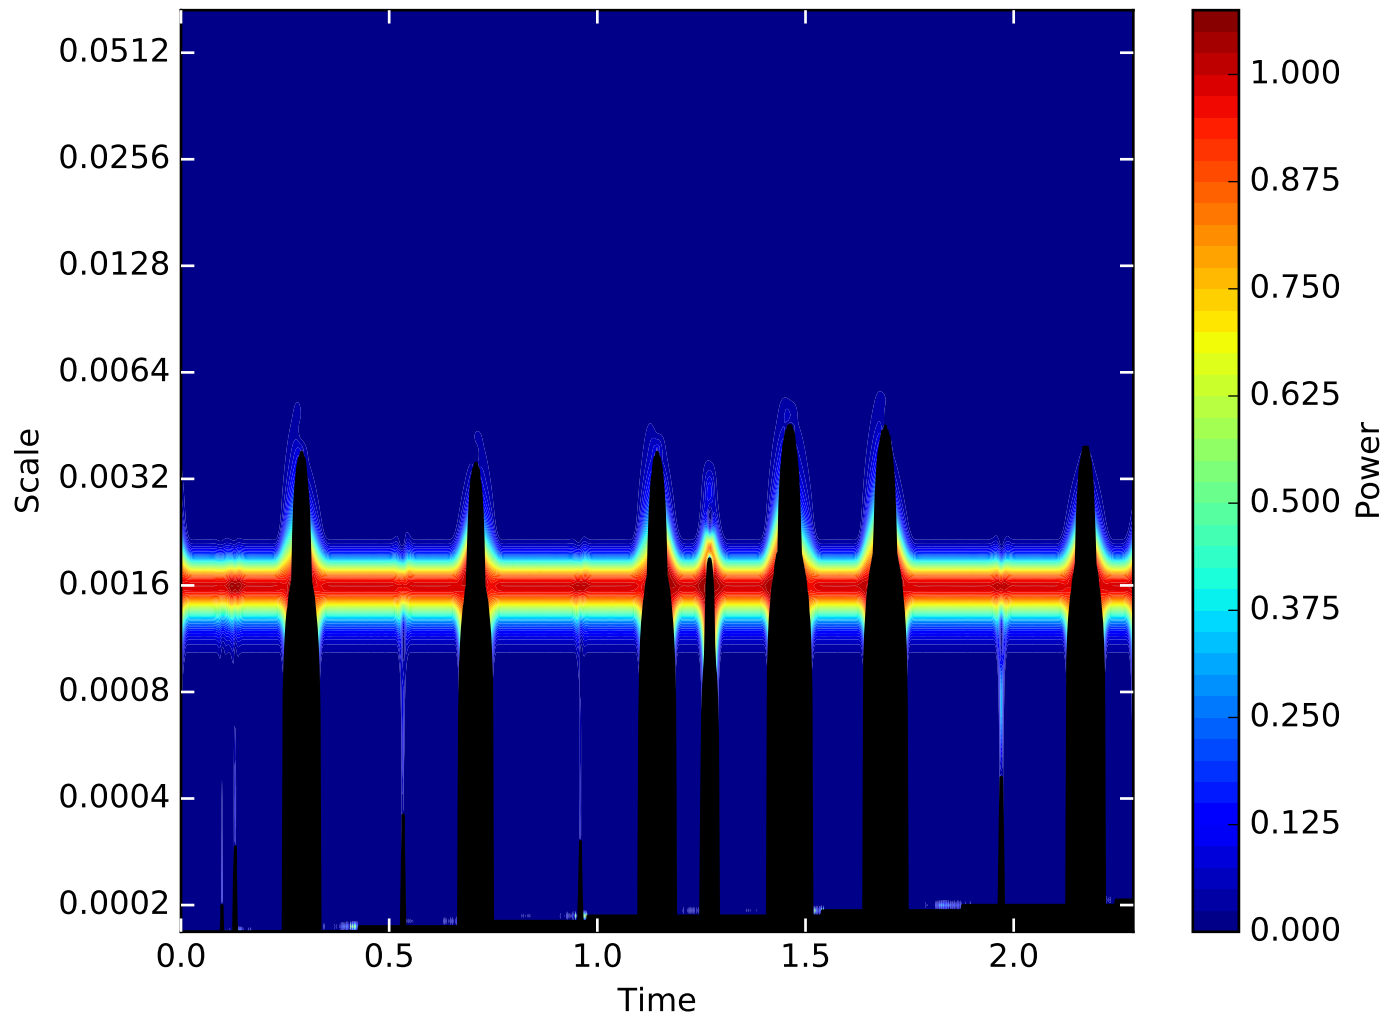

Supplement: Supplementary file 13 [file npg-2017-27-supplement.zip]

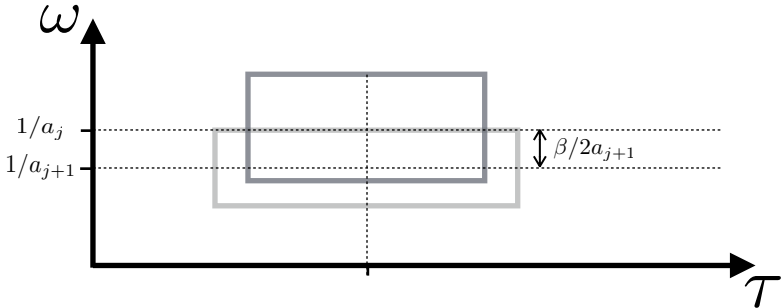

Supplement: Supplementary file 14 [file npg-2017-27-supplement.zip]

# Wavelet amplitude - No refinement of the SNEZ

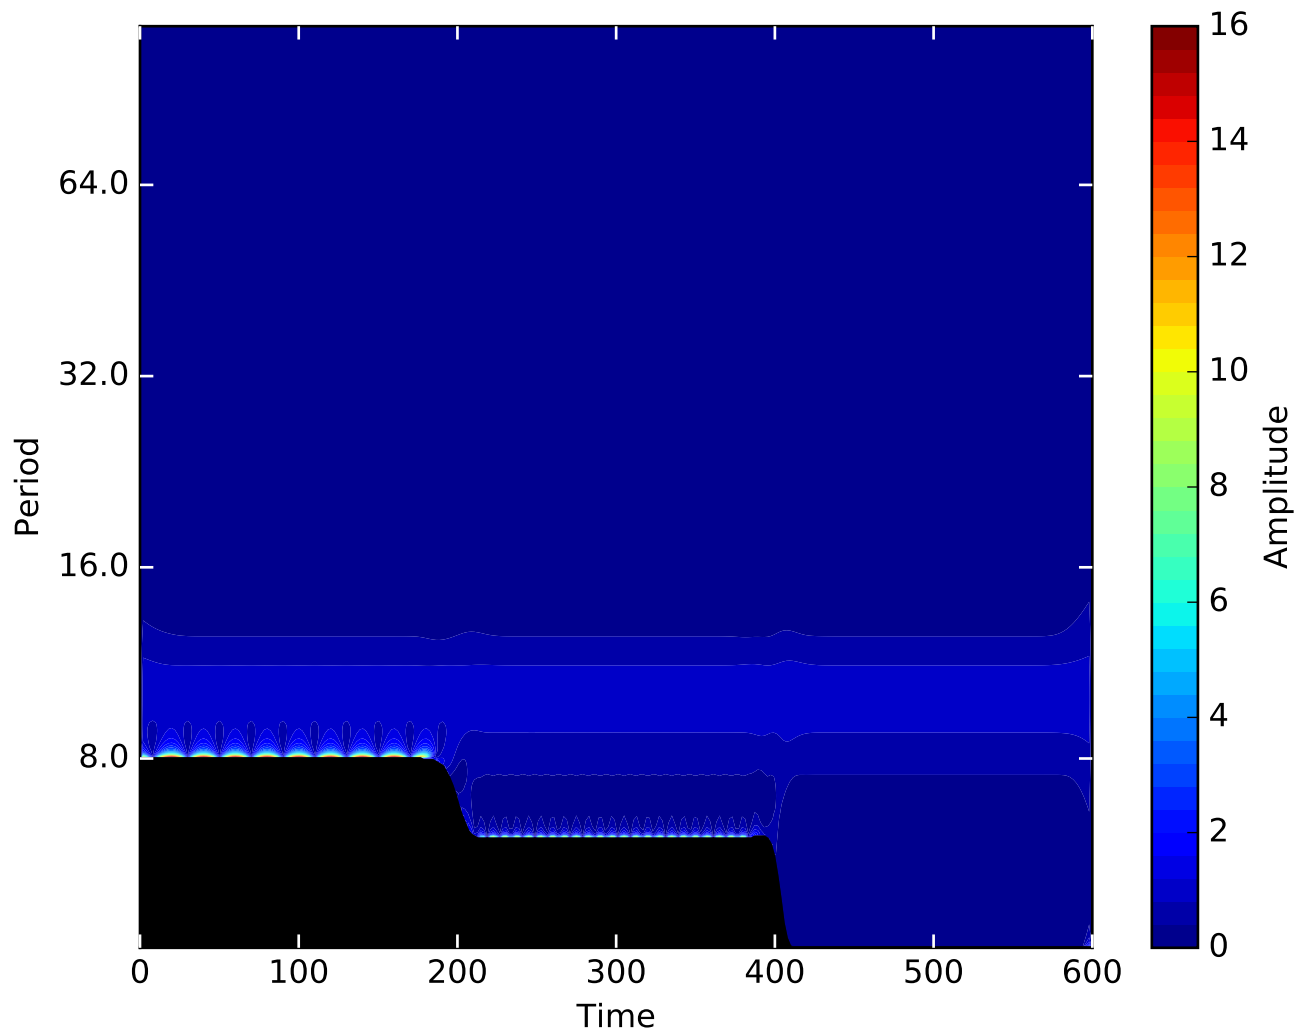

Supplement: Supplementary file 15 [file npg-2017-27-supplement.zip]

Wavelet scalogram & 95.0 % confidence levels  
Interpolated with  $\Delta t = 300$  yr

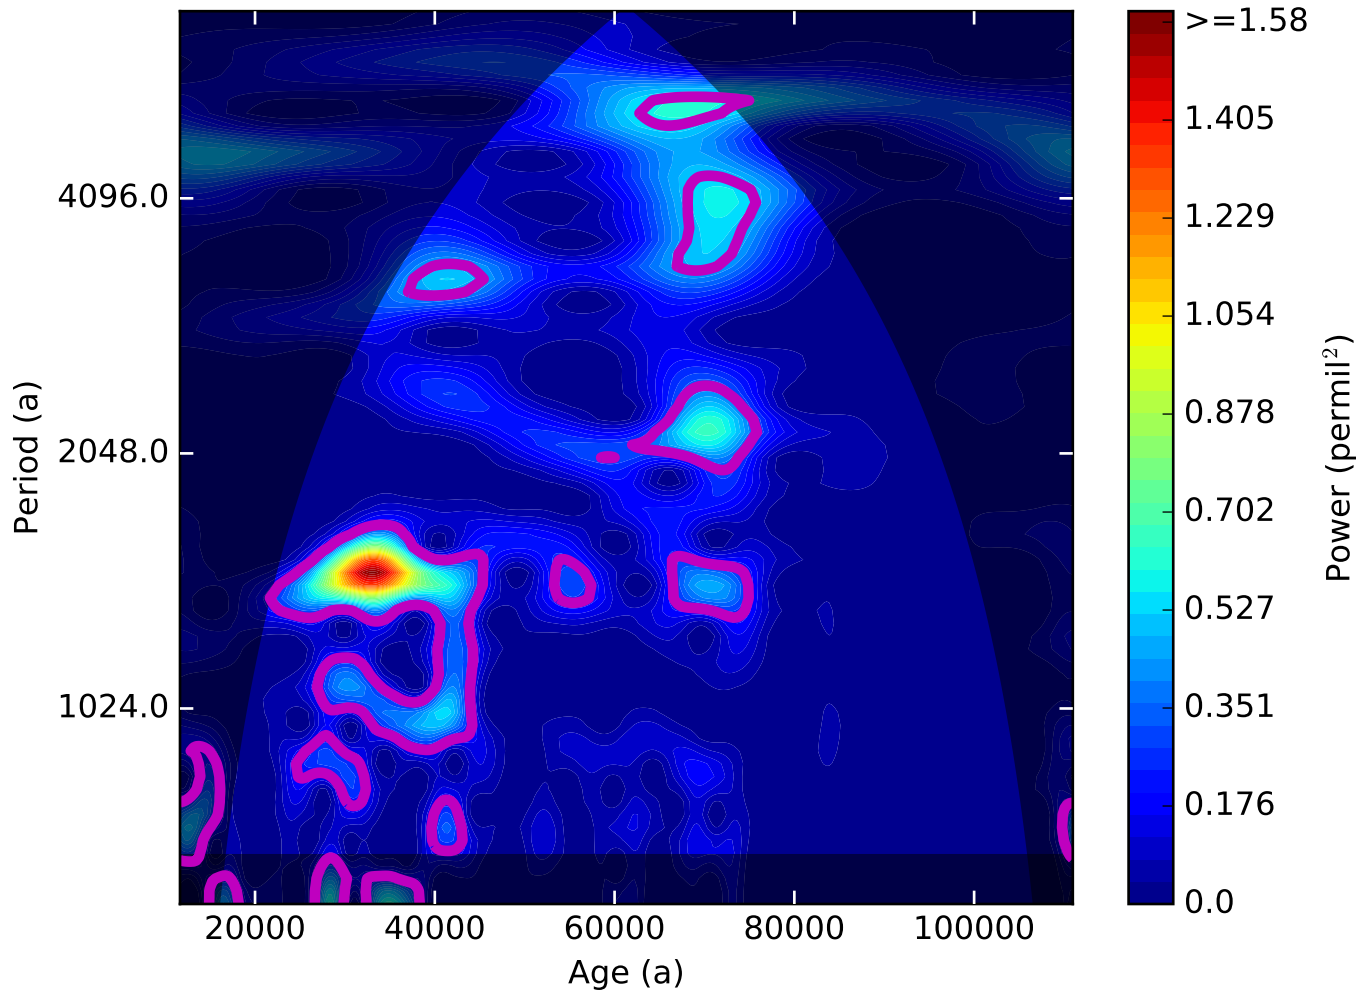

Supplement: Supplementary file 16 [file npg-2017-27-supplement.zip]

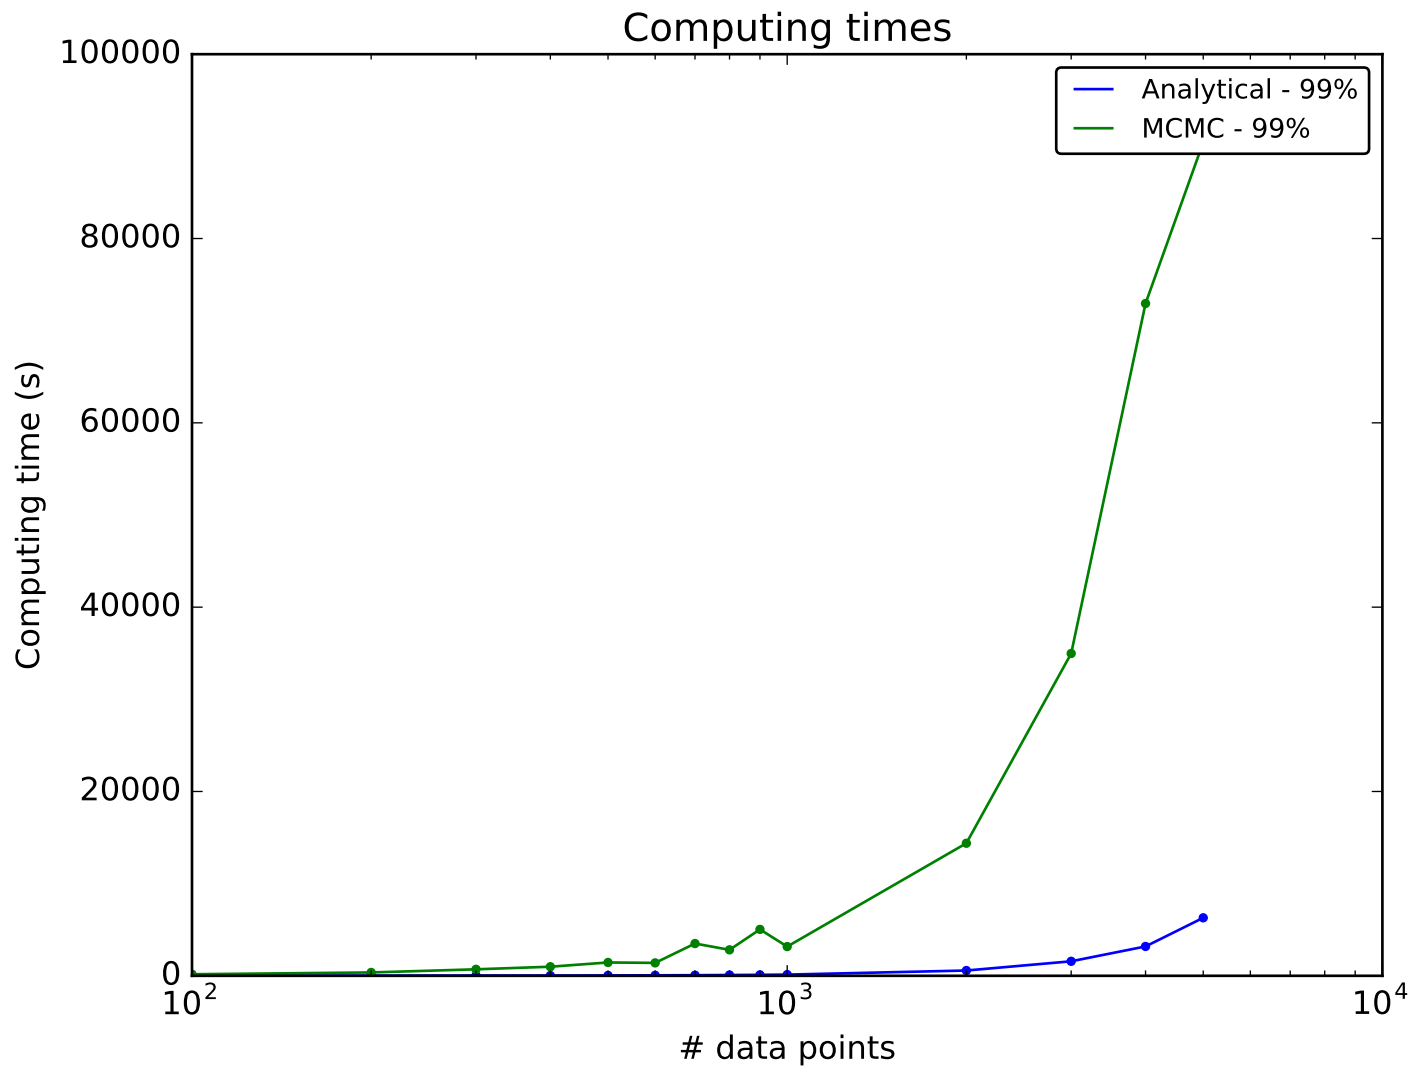

Supplement: Supplementary file 17 [file npg-2017-27-supplement.zip]

Wavelet scalogram - No SNEZ

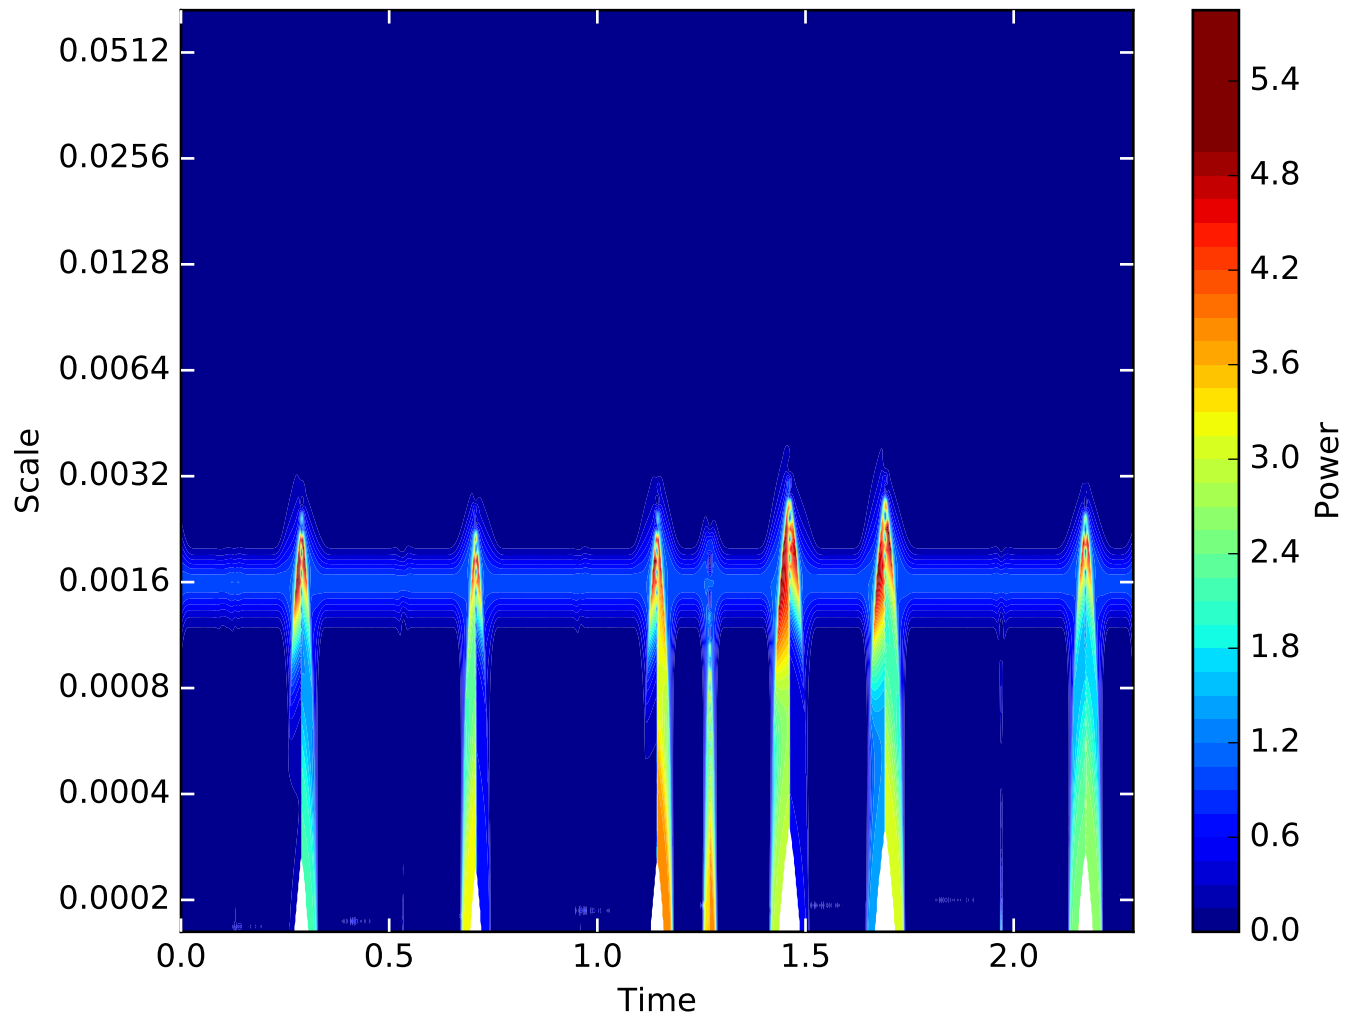

Supplement: Supplementary file 18 [file npg-2017-27-supplement.zip]

Computing times

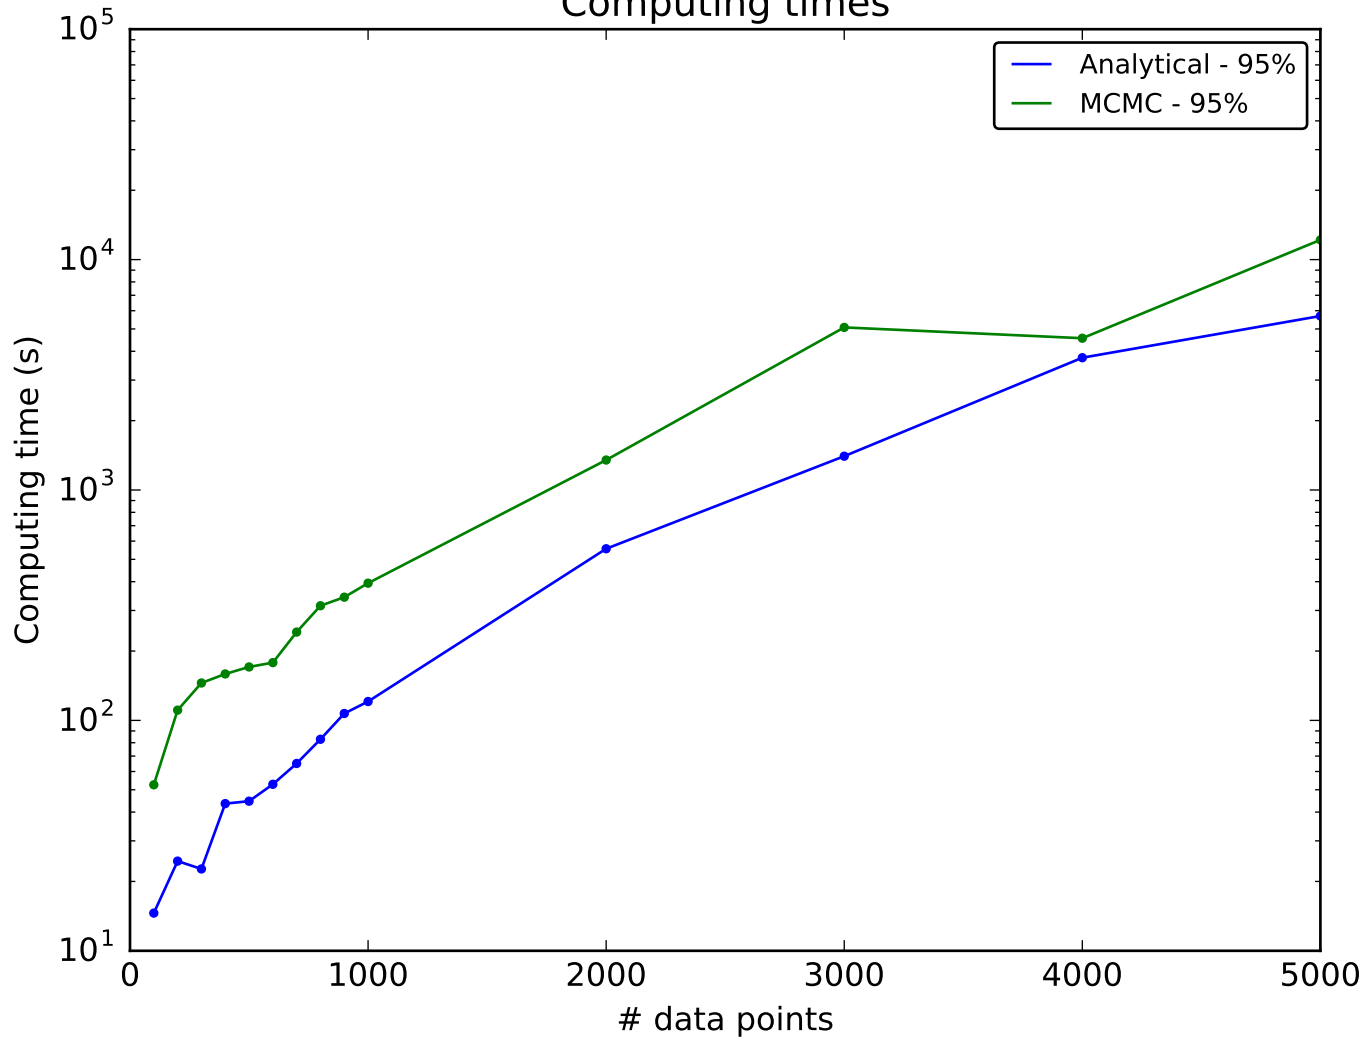

Supplement: Supplementary file 19 [file npg-2017-27-supplement.zip]

Wavelet scalogram & 95.0 % confidence levels - w0=5.5

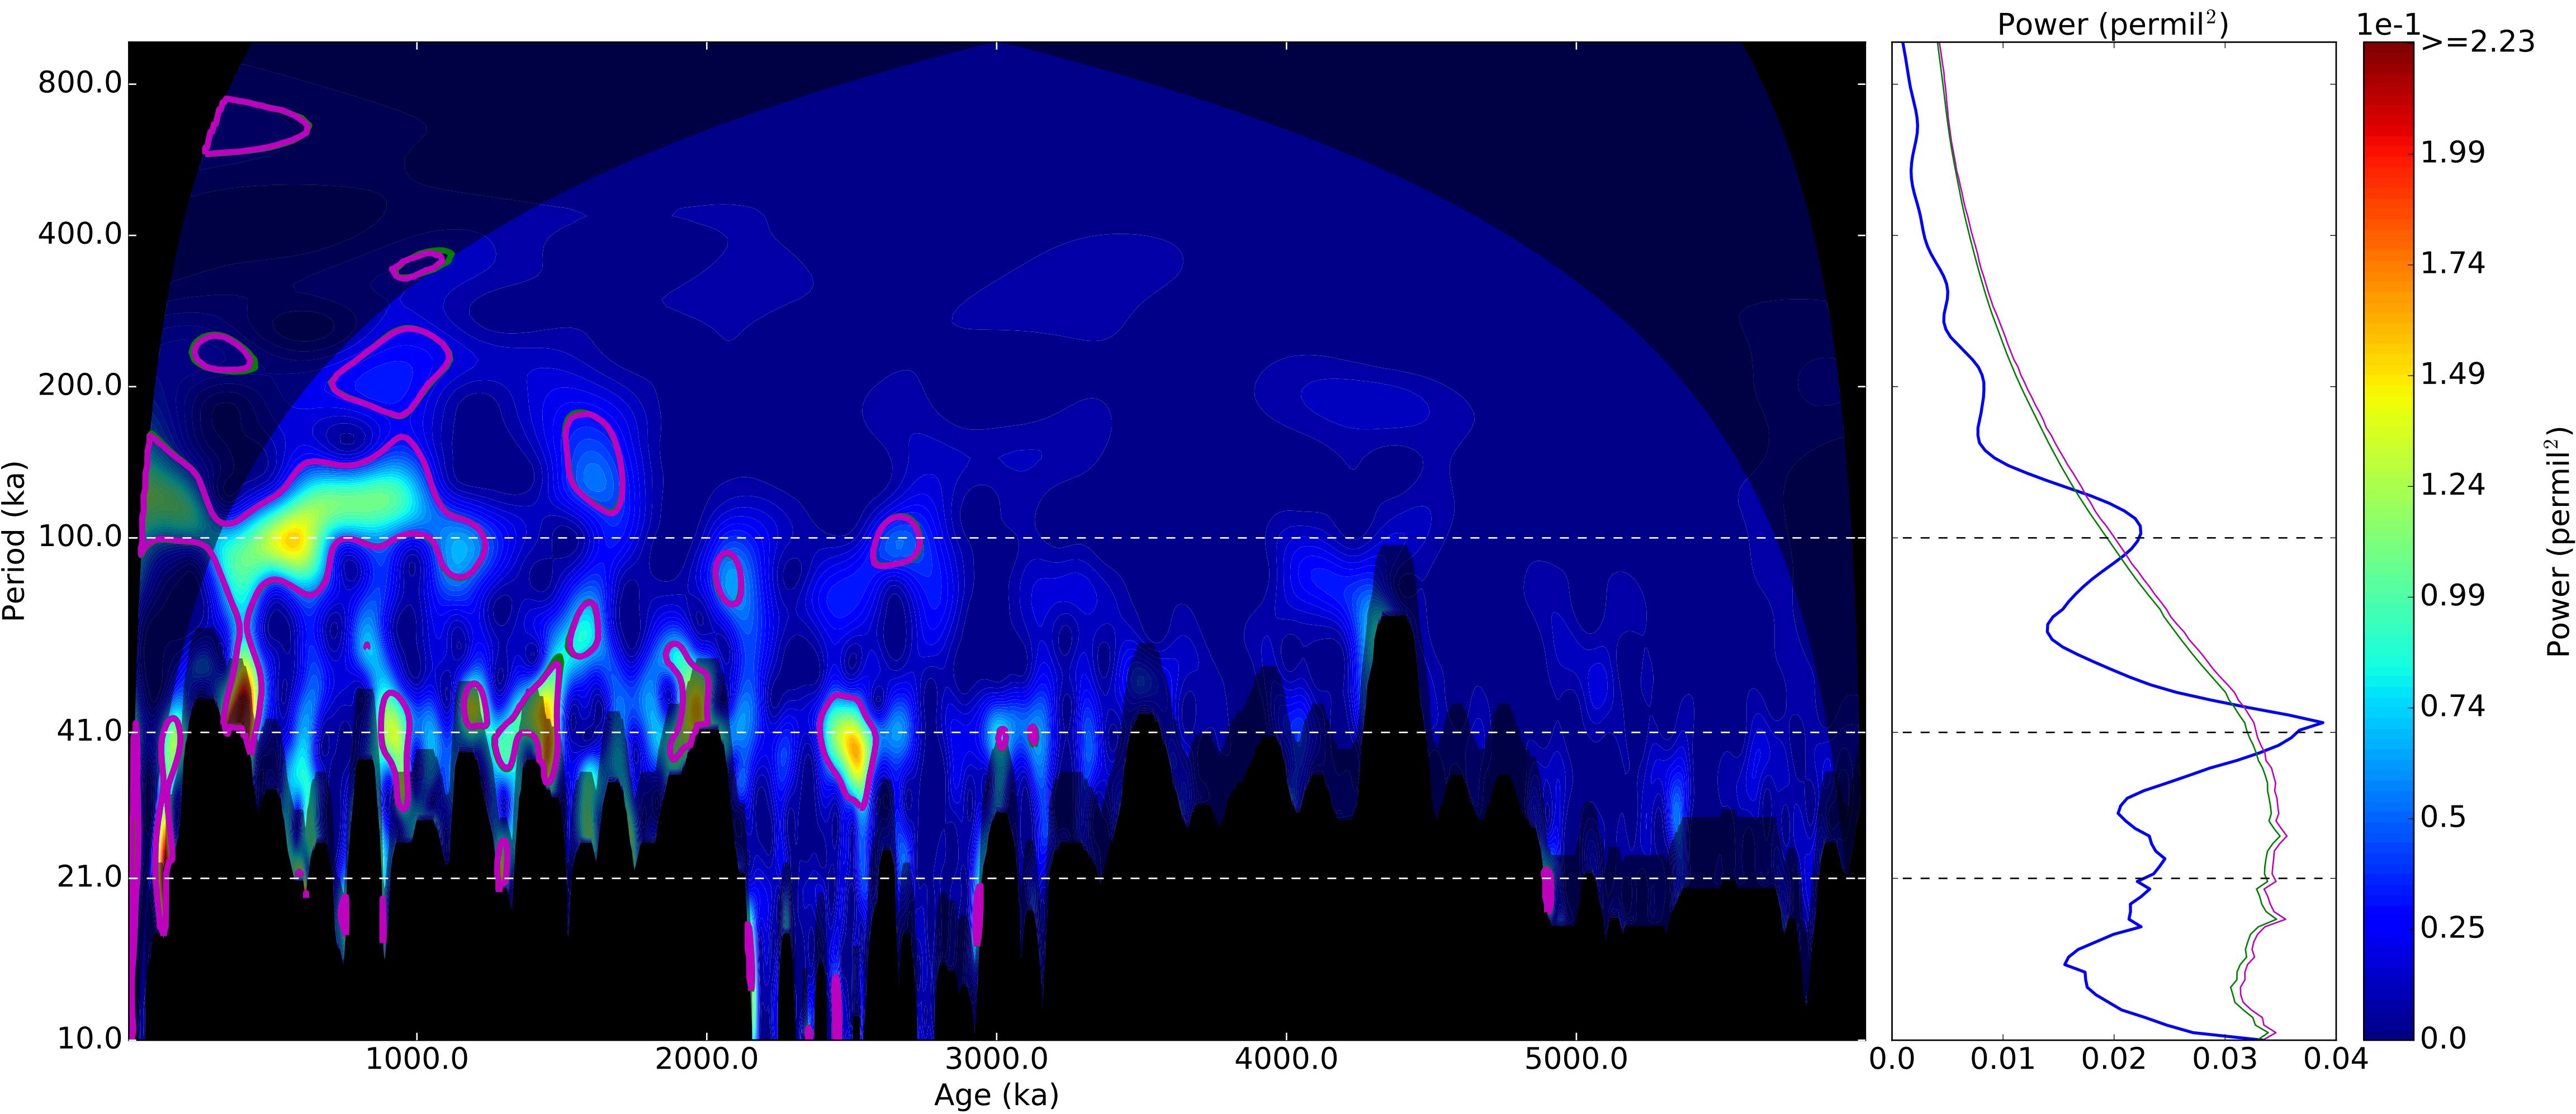

Supplement: Supplementary file 20 [file npg-2017-27-supplement.zip]

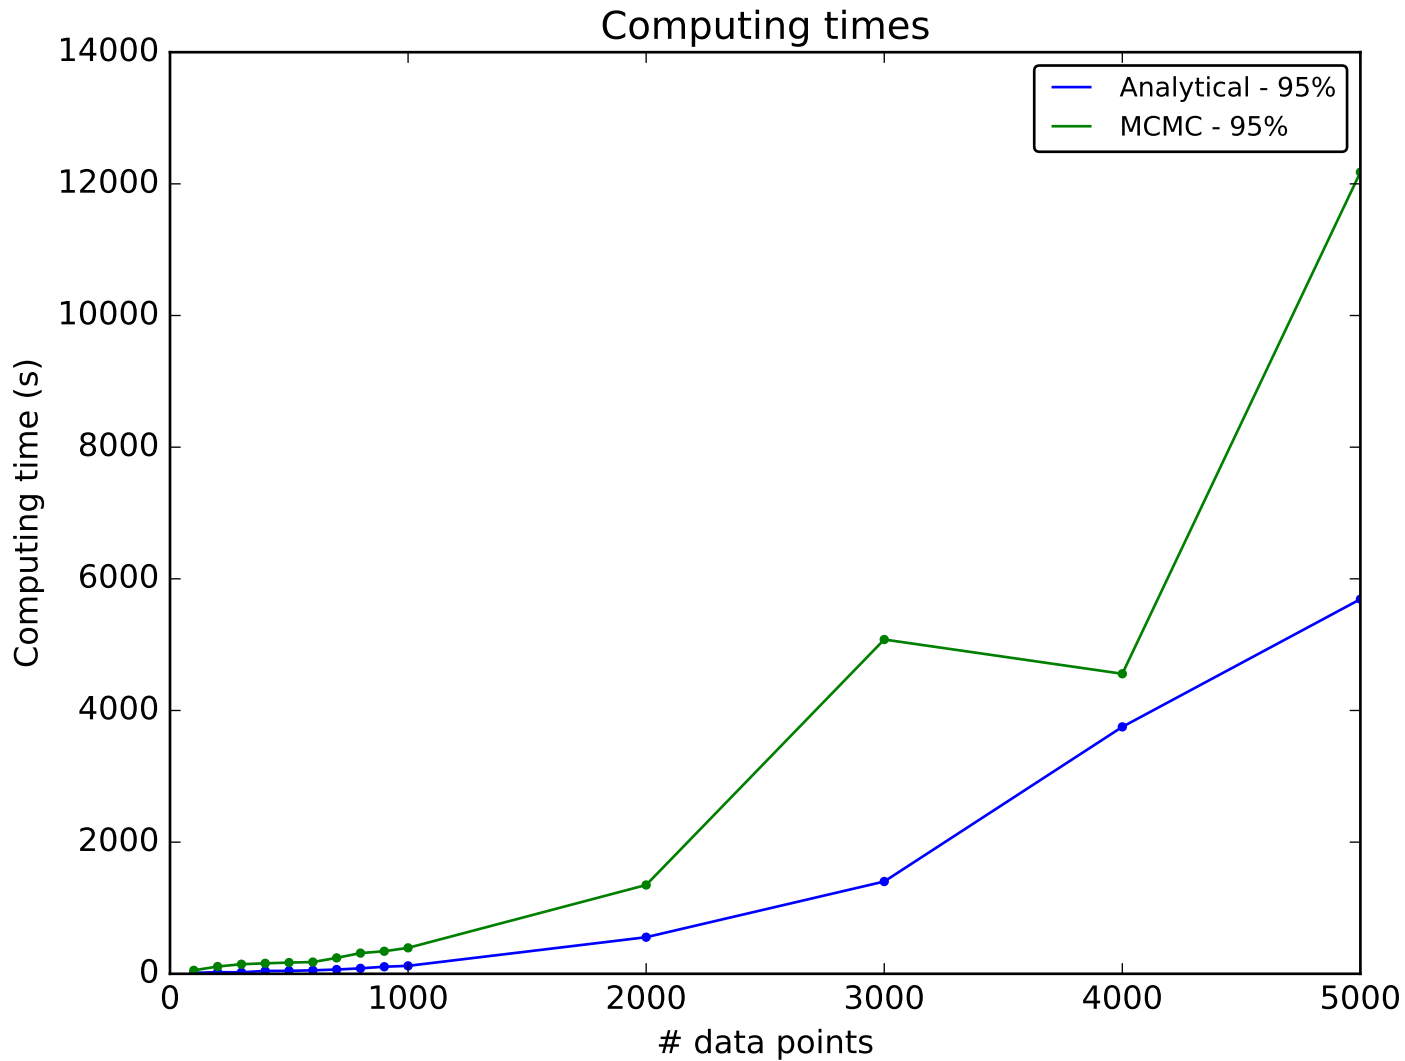

Supplement: Supplementary file 21 [file npg-2017-27-supplement.zip]

Computing times

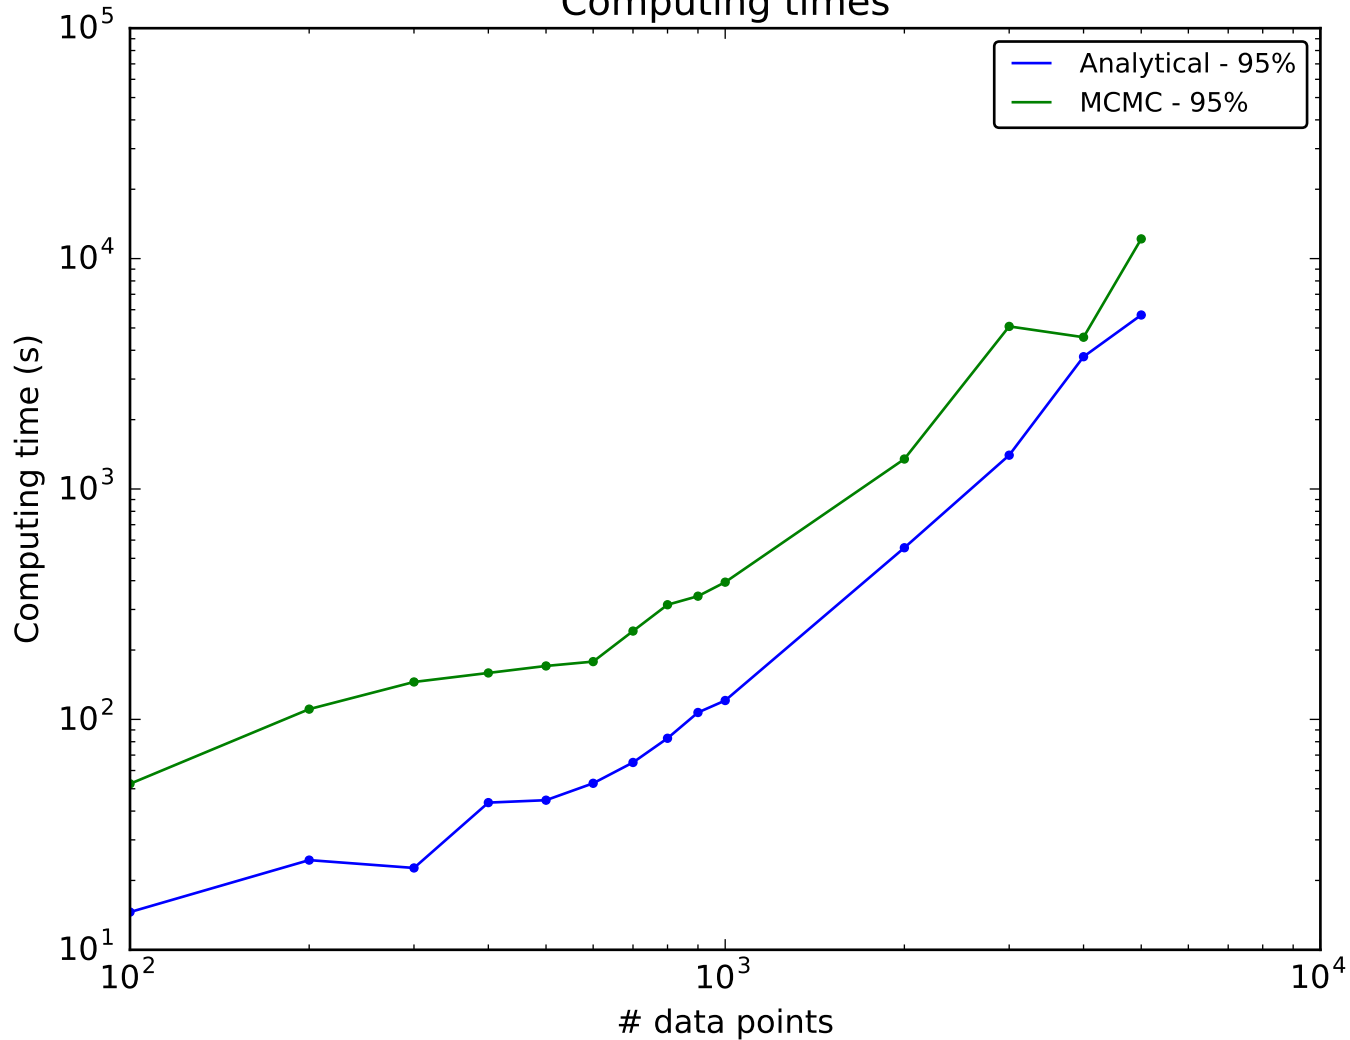

Supplement: Supplementary file 22 [file npg-2017-27-supplement.zip]

Interpolated time series with  $\Delta t = 300$  yr

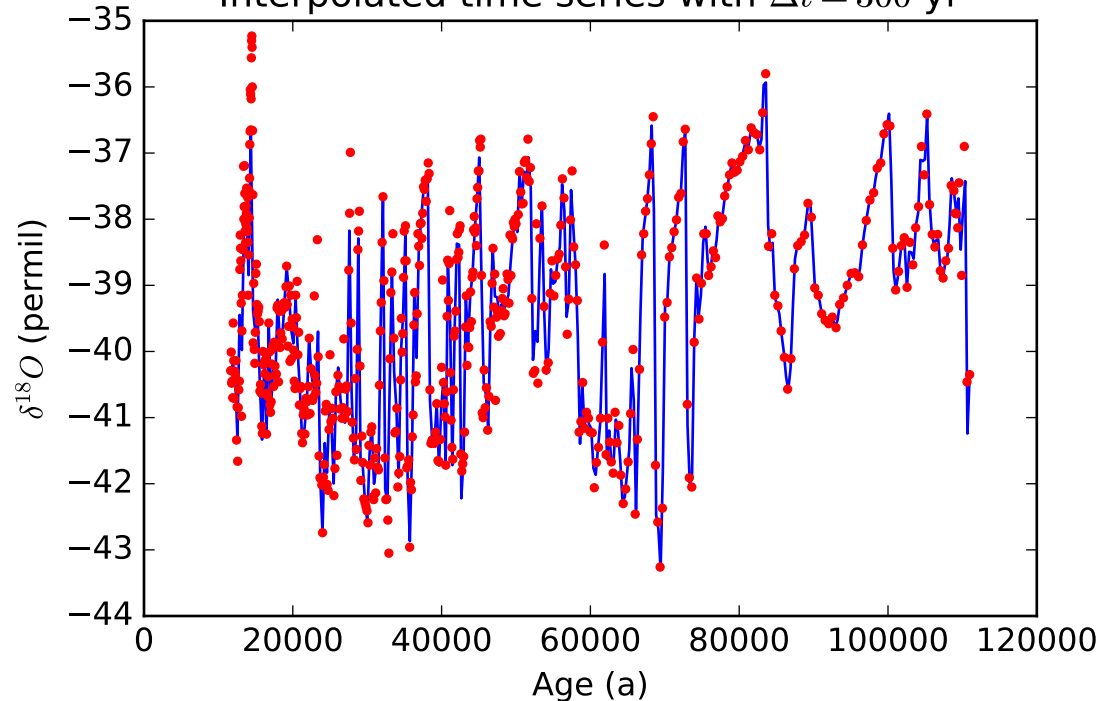

Supplement: Supplementary file 23 [file npg-2017-27-supplement.zip]

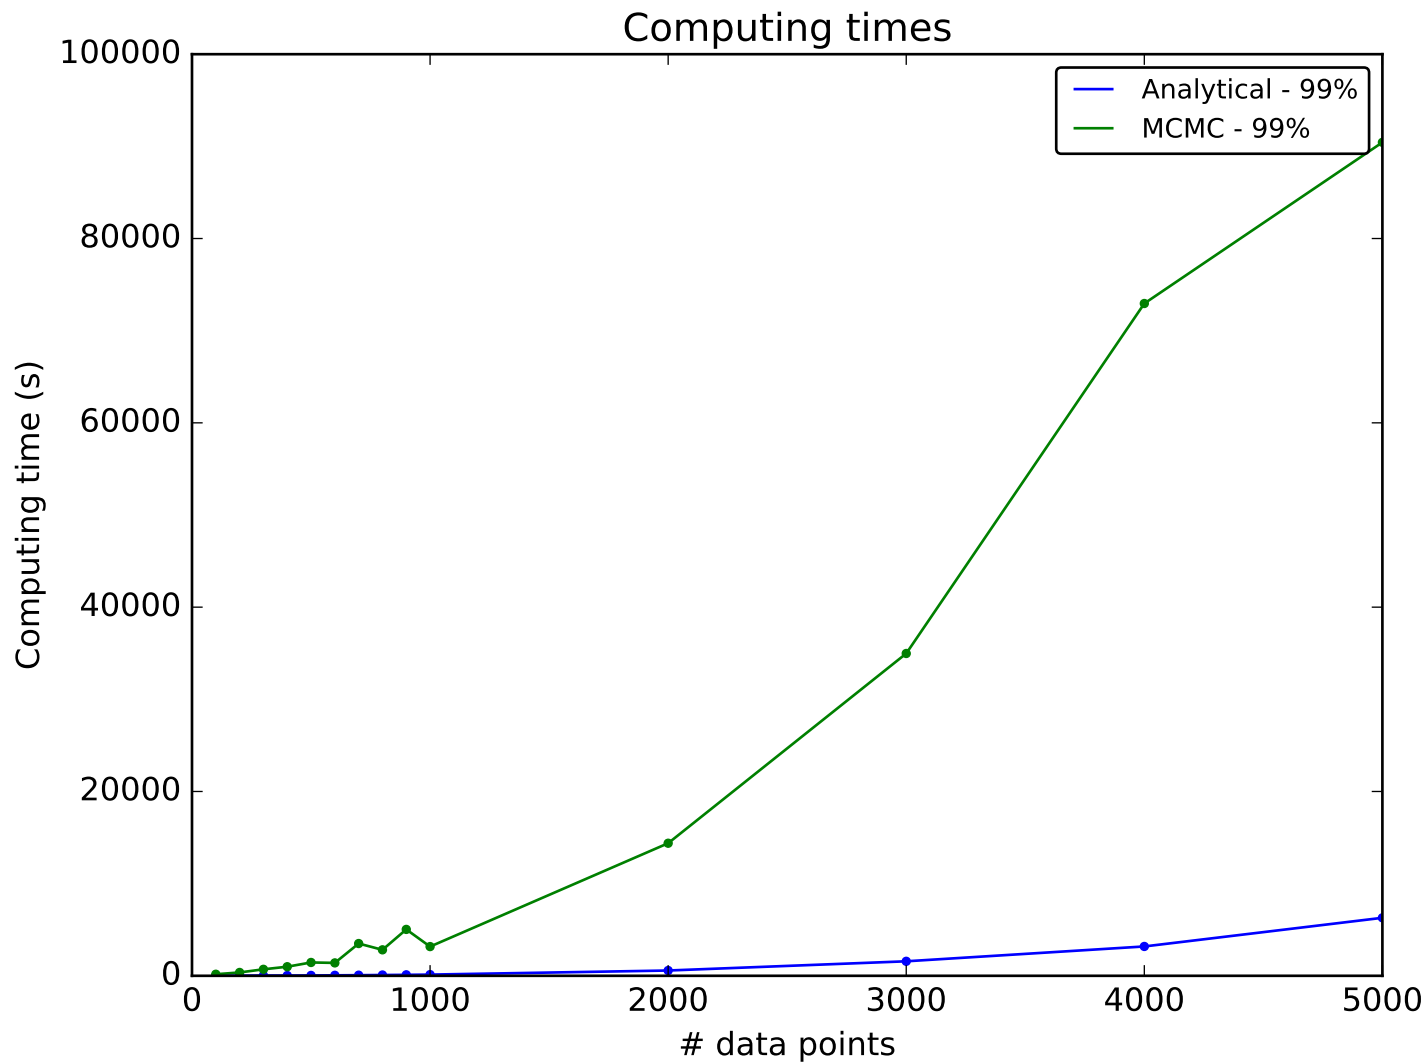

Supplement: Supplementary file 24 [file npg-2017-27-supplement.zip]

Age step in function of age

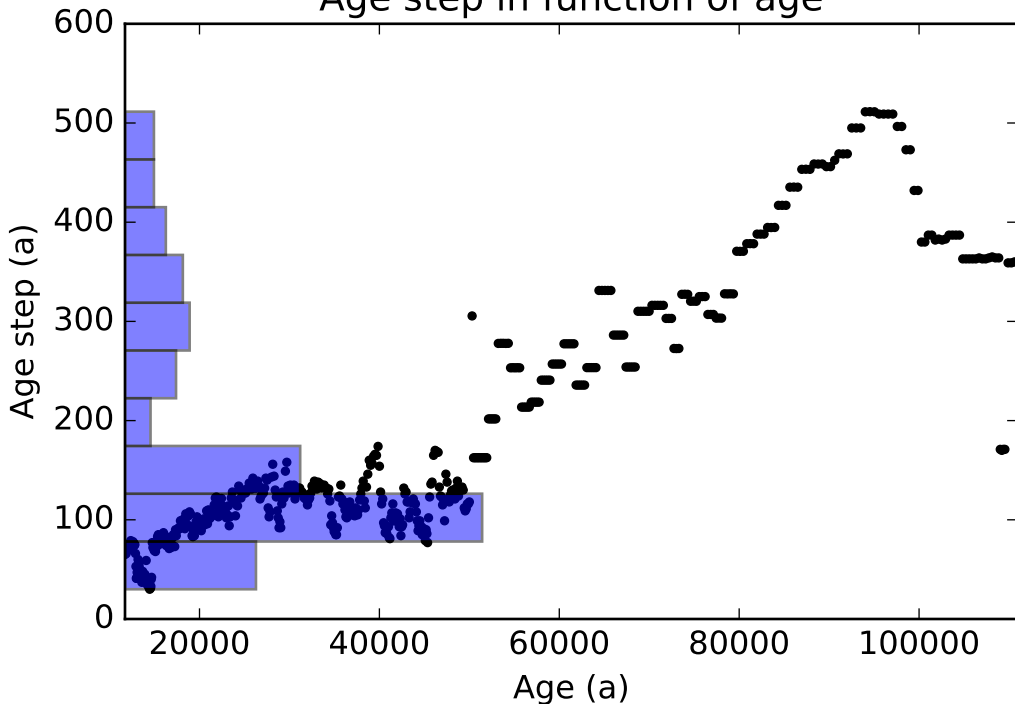

Supplement: Supplementary file 25 [file npg-2017-27-supplement.zip]

Time step in function of time

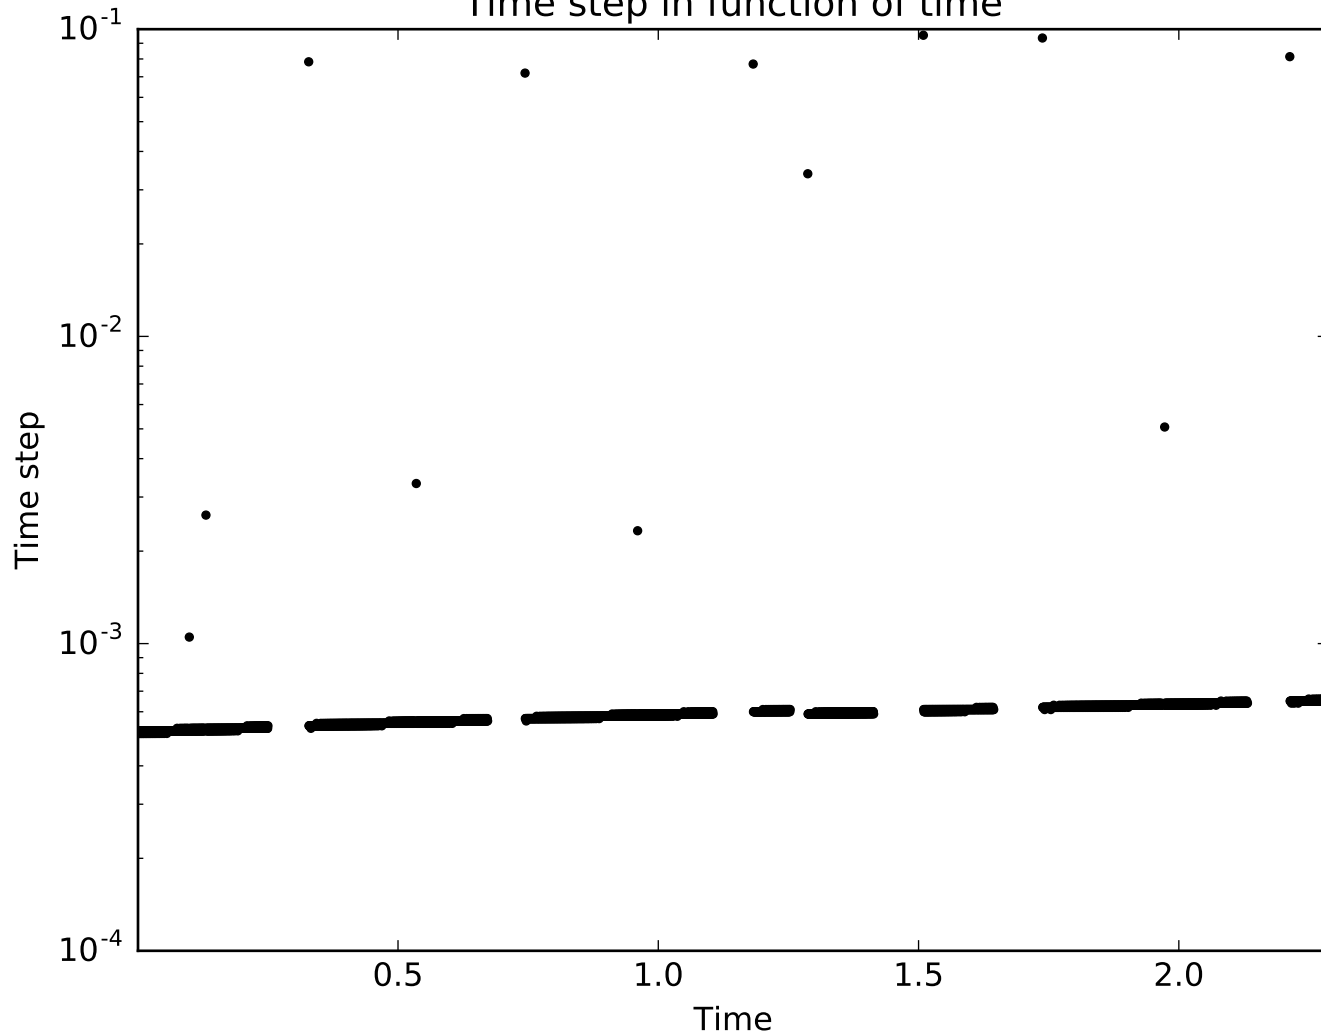

Supplement: Supplementary file 26 [file npg-2017-27-supplement.zip]

Wavelet scalogram & 95.0 % confidence levels  
Interpolated with  $\Delta t = 30$  yr

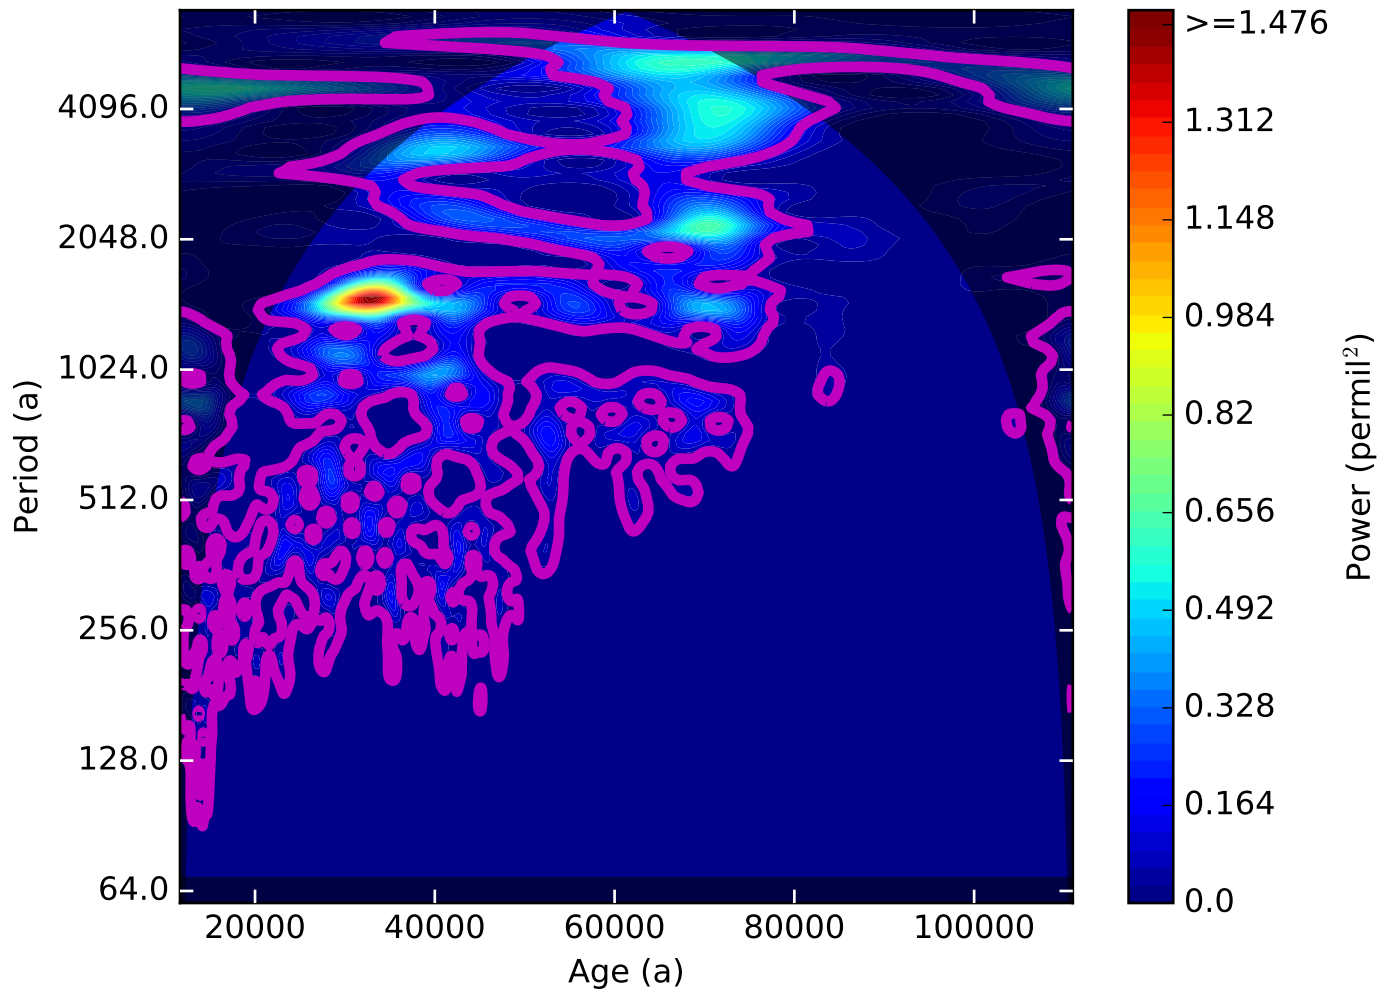

Supplement: Supplementary file 27 [file npg-2017-27-supplement.zip]

# Convergence of the analytical percentiles

— 99.9%

(age,per)=(15.8699,11.8921)

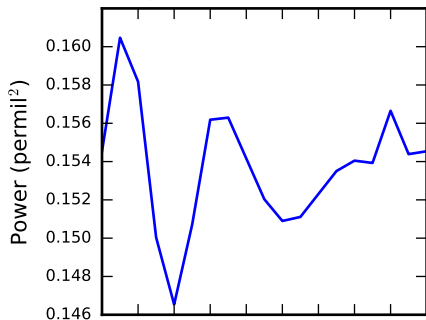

(age,per)=(3746.6738,72.1000)

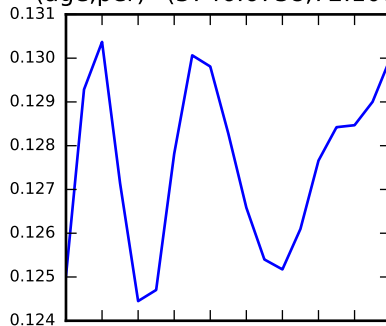

(age,per)=(1417.3888,685.9350)

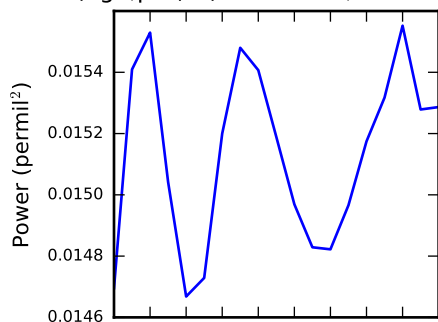

(age,per)=(5079.1038,393.9662)

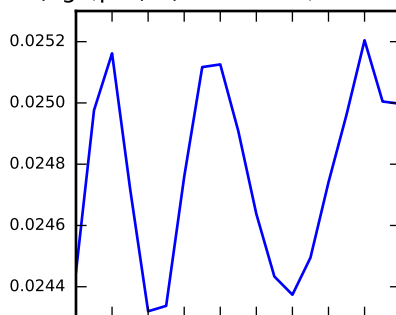

(age,per)=(3973.6804,45.9479)

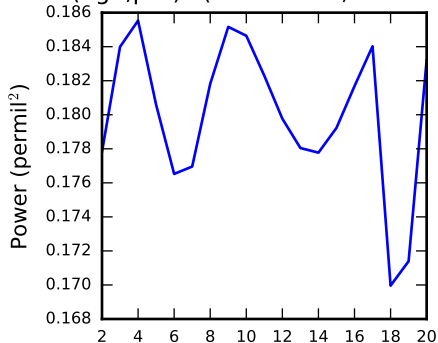

(age,per)=(1506.2175,31.3834)

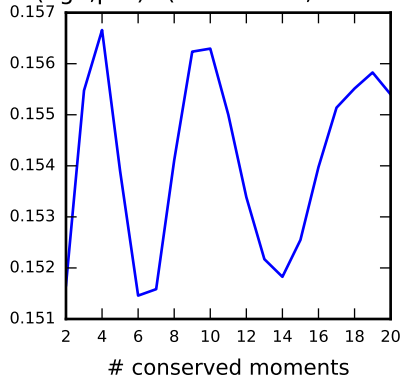

Supplement: Supplementary file 28 [file npg-2017-27-supplement.zip]

Wavelet scalogram & 95.0 % confidence levels - w0=15

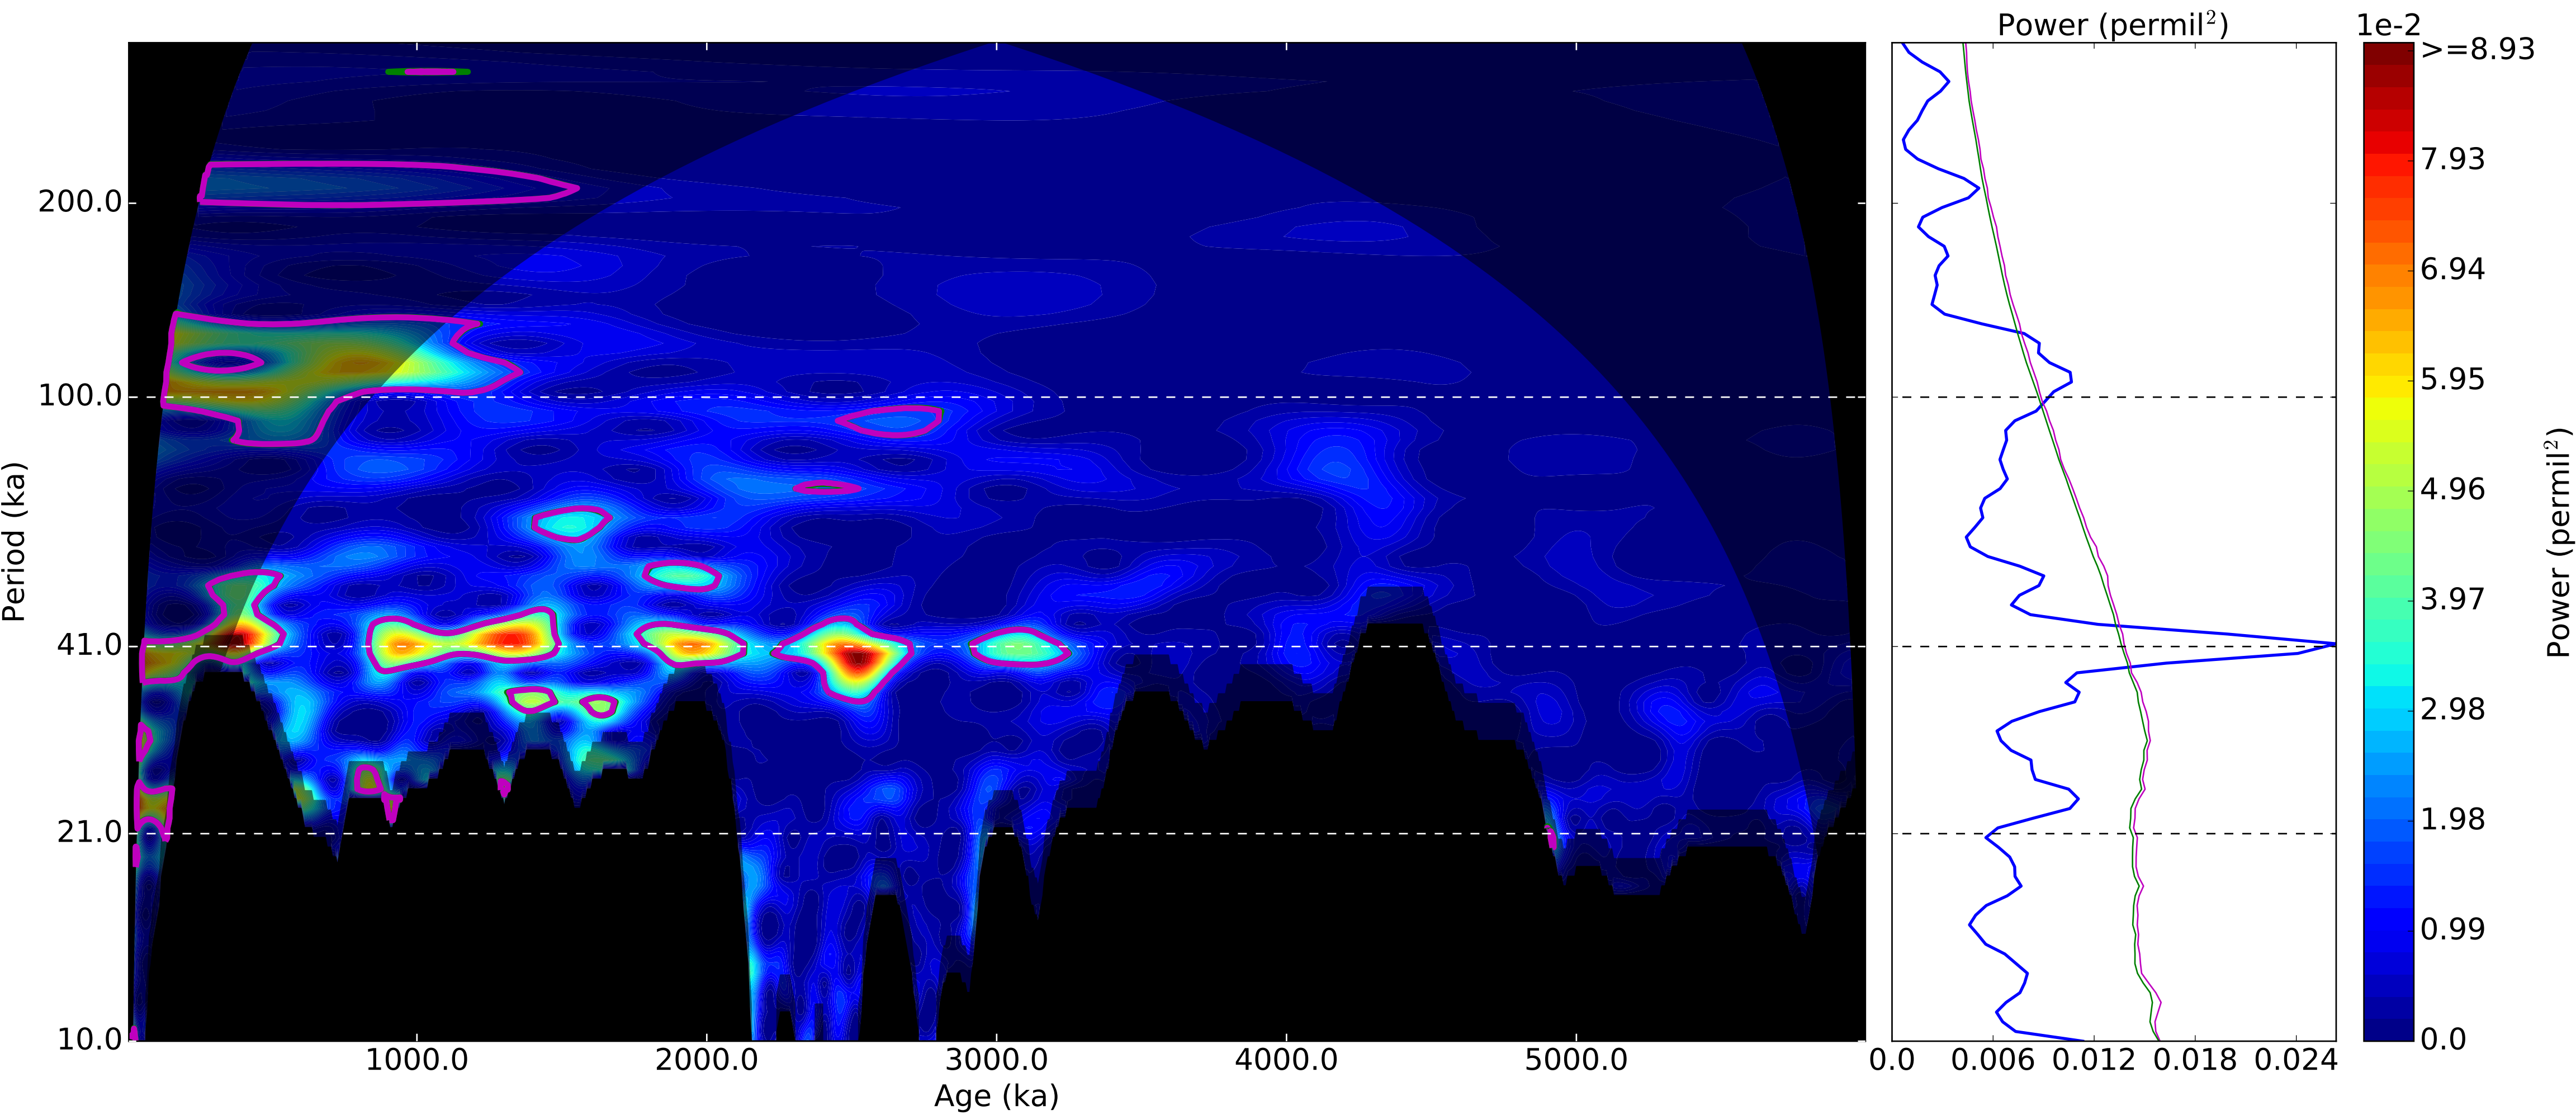

Supplement: Supplementary file 29 [file npg-2017-27-supplement.zip]

# Wavelet scalogram & 95.0 % confidence levels

With WAVEPAL

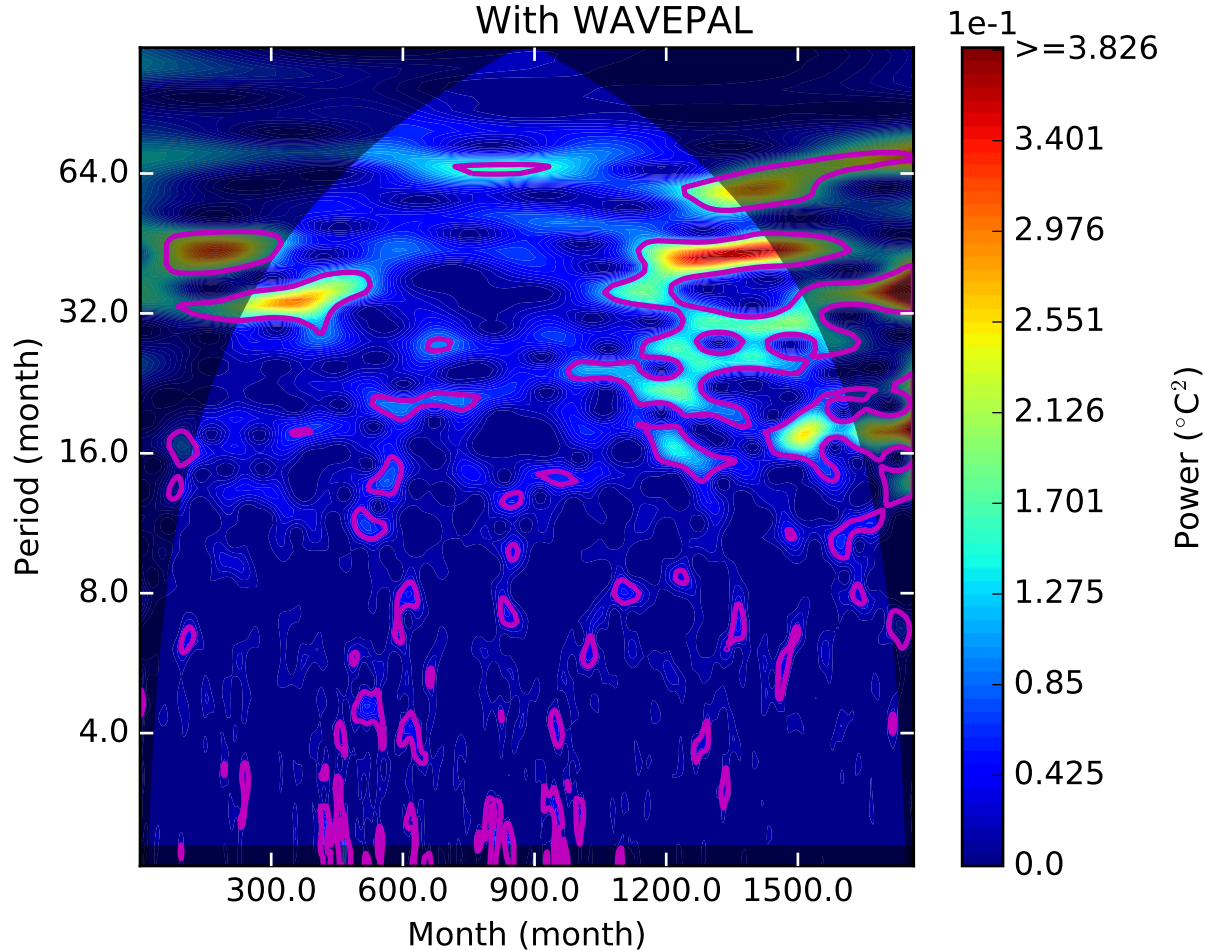

Supplement: Supplementary file 30 [file npg-2017-27-supplement.zip]

$\delta^{18}O$  (permil)

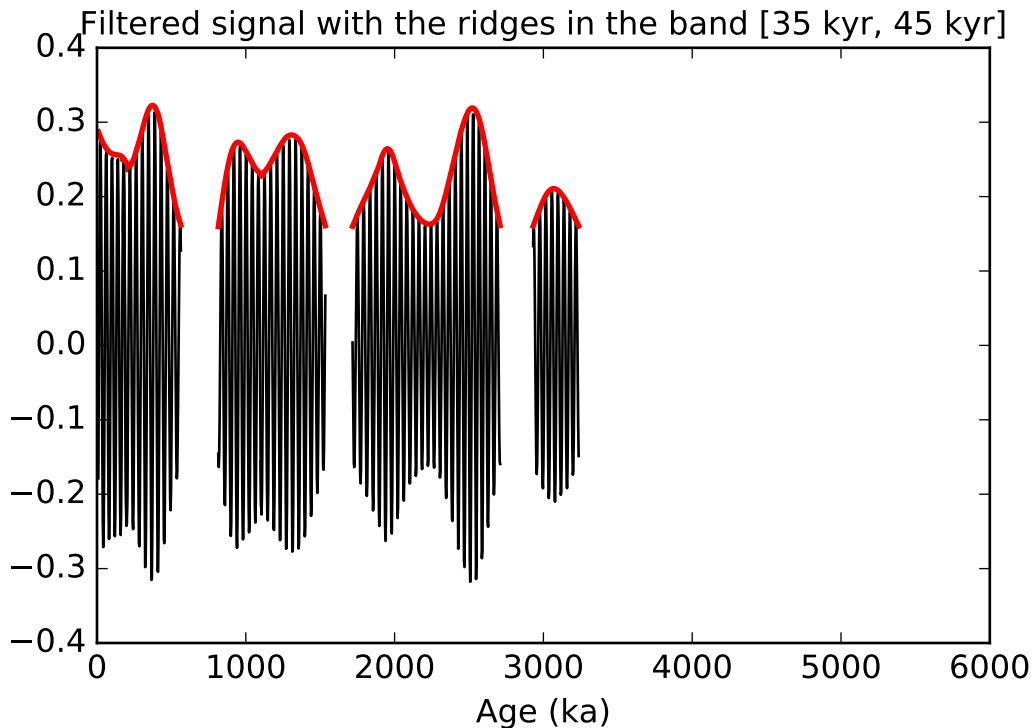

Supplement: Supplementary file 31 [file npg-2017-27-supplement.zip]

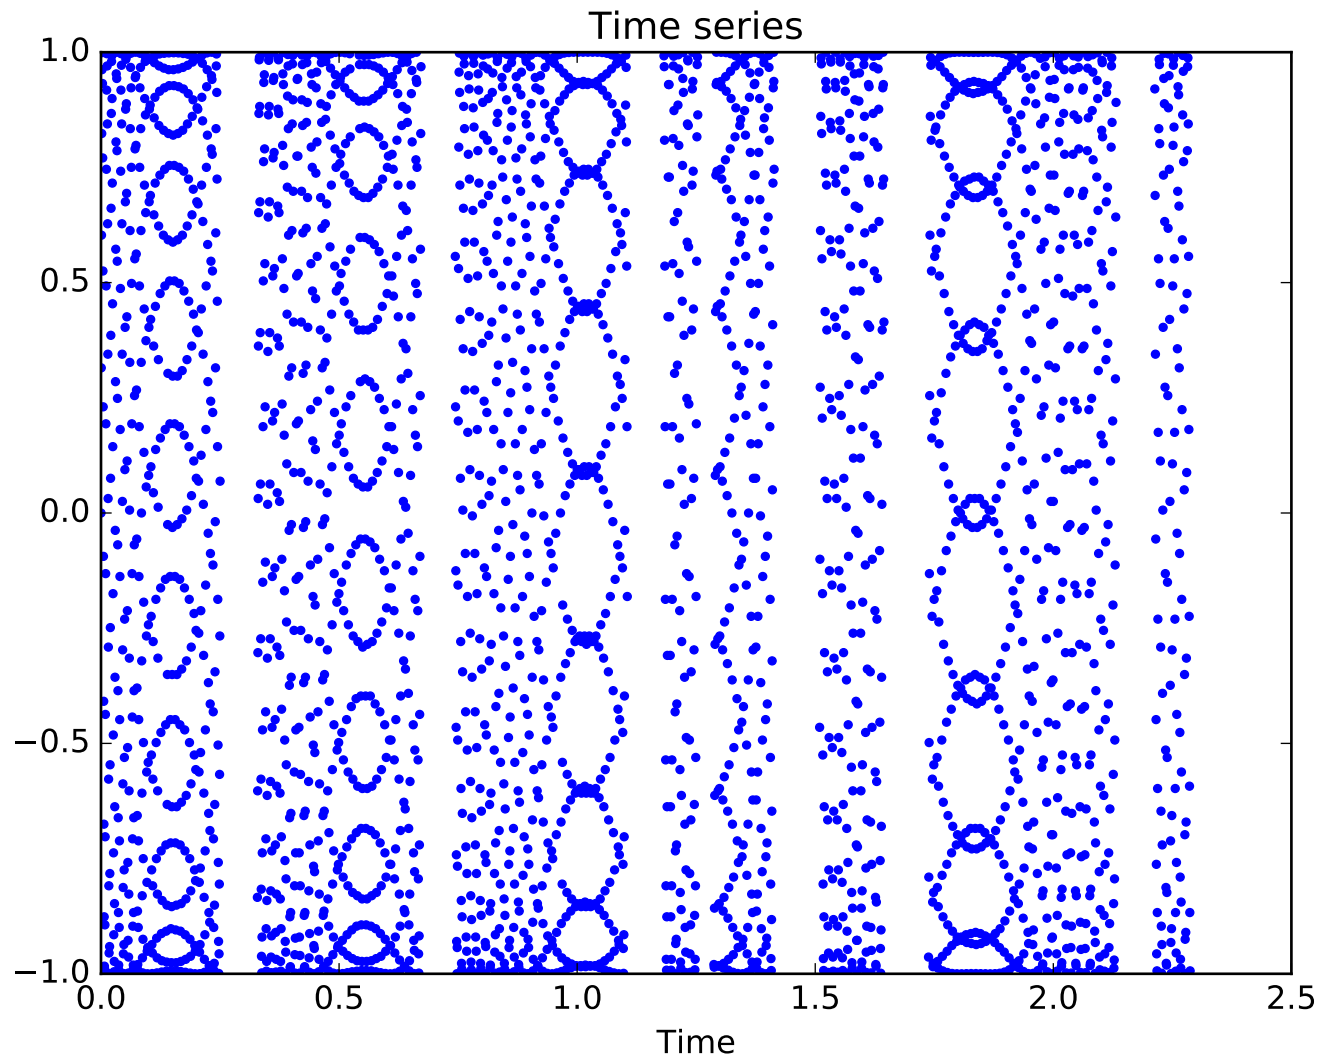

Supplement: Supplementary file 32 [file npg-2017-27-supplement.zip]

# Wavelet amplitude - w0=15

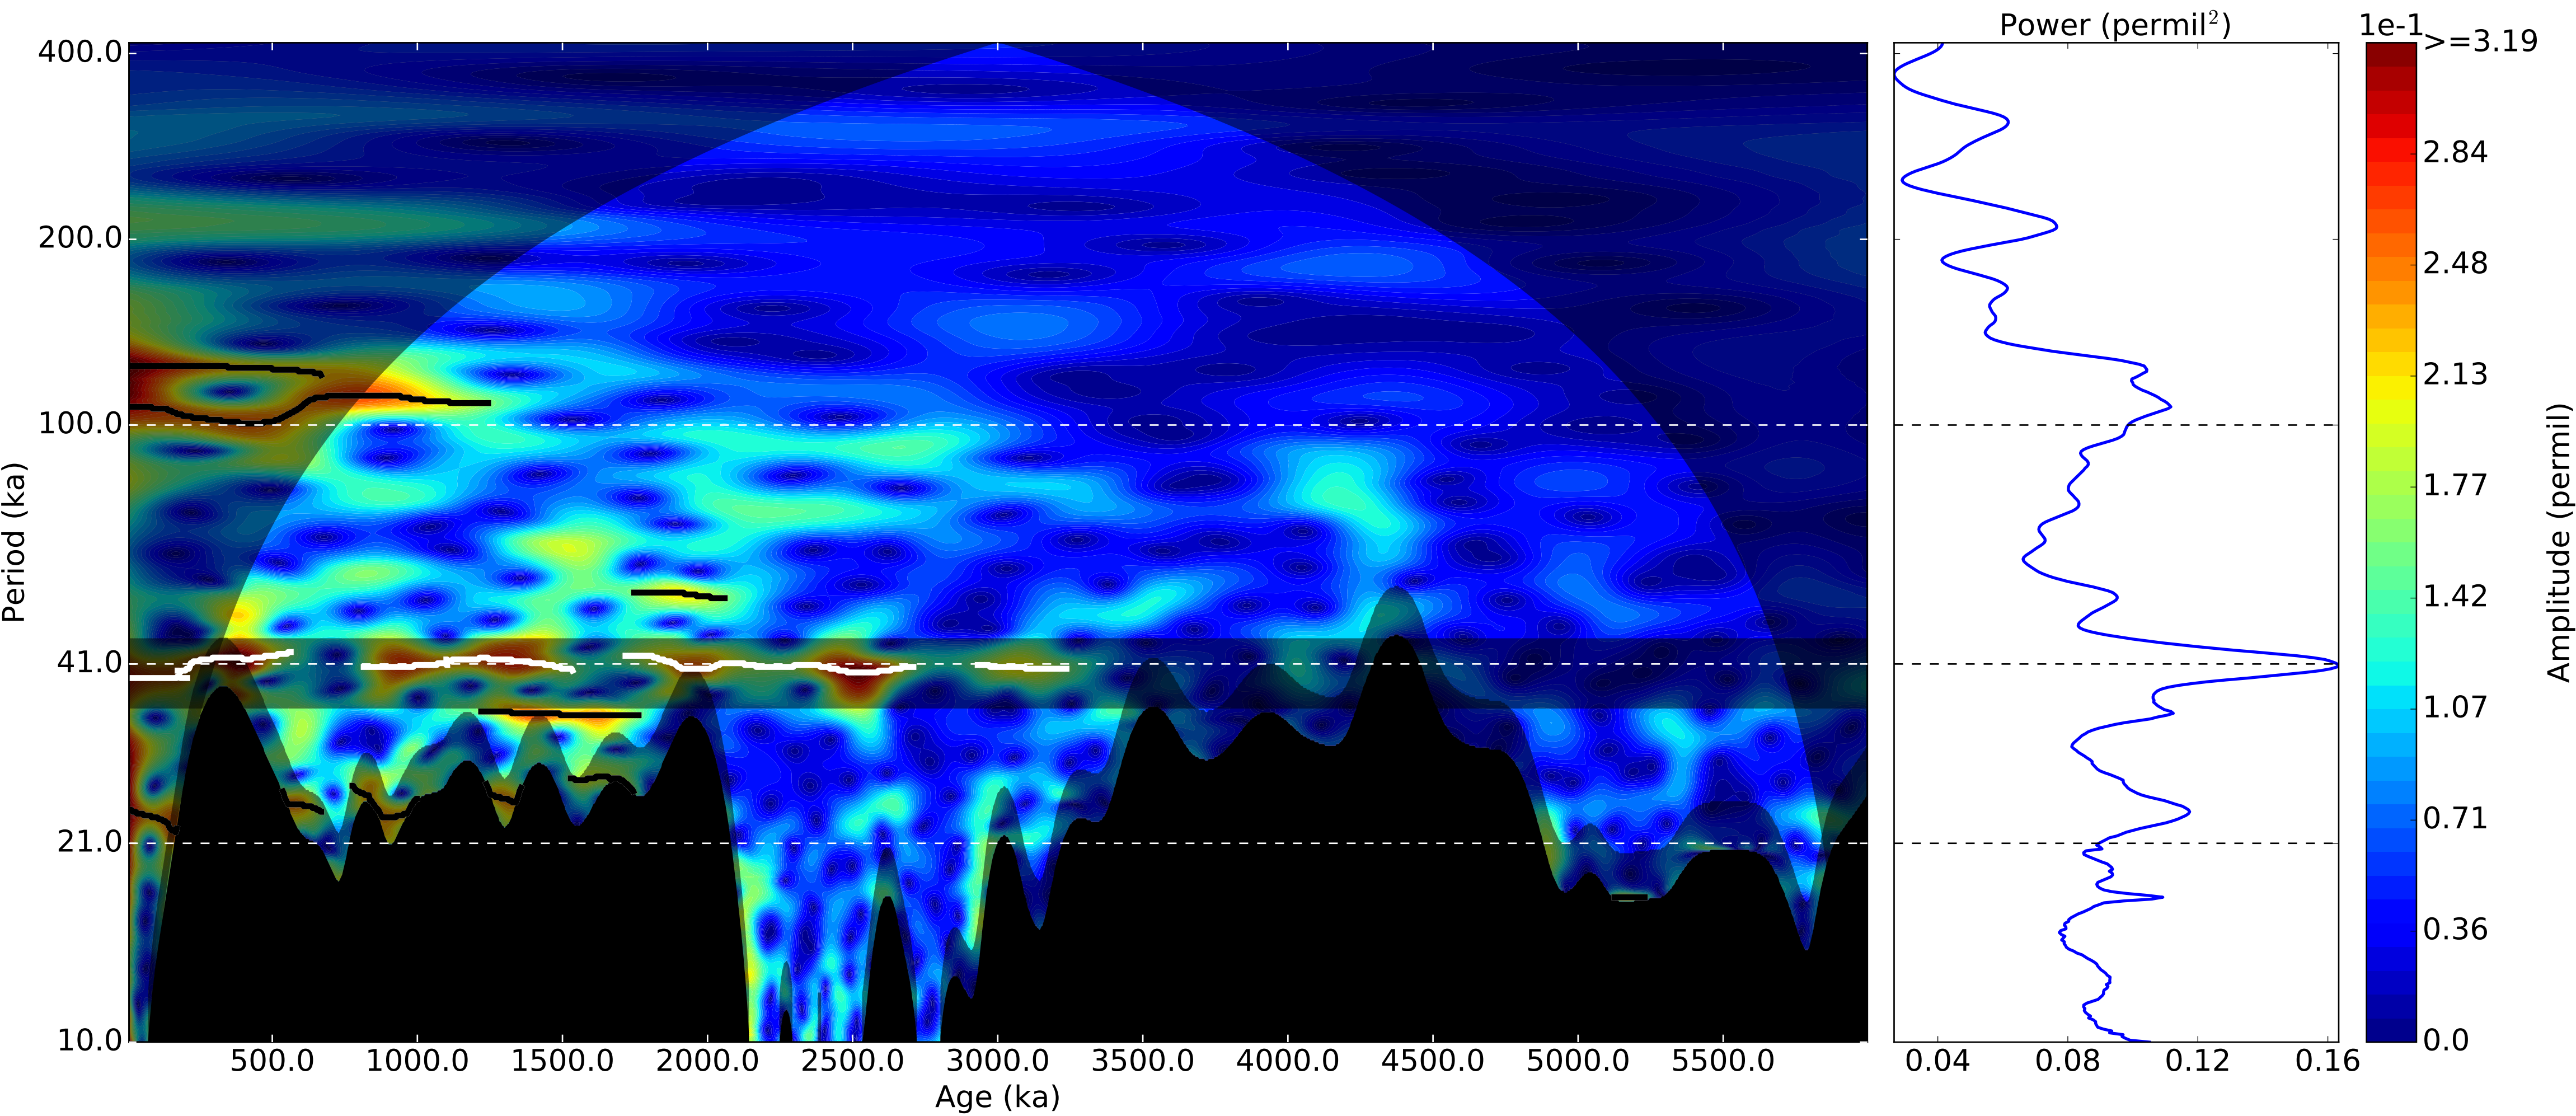

Supplement: Supplementary file 33 [file npg-2017-27-supplement.zip]

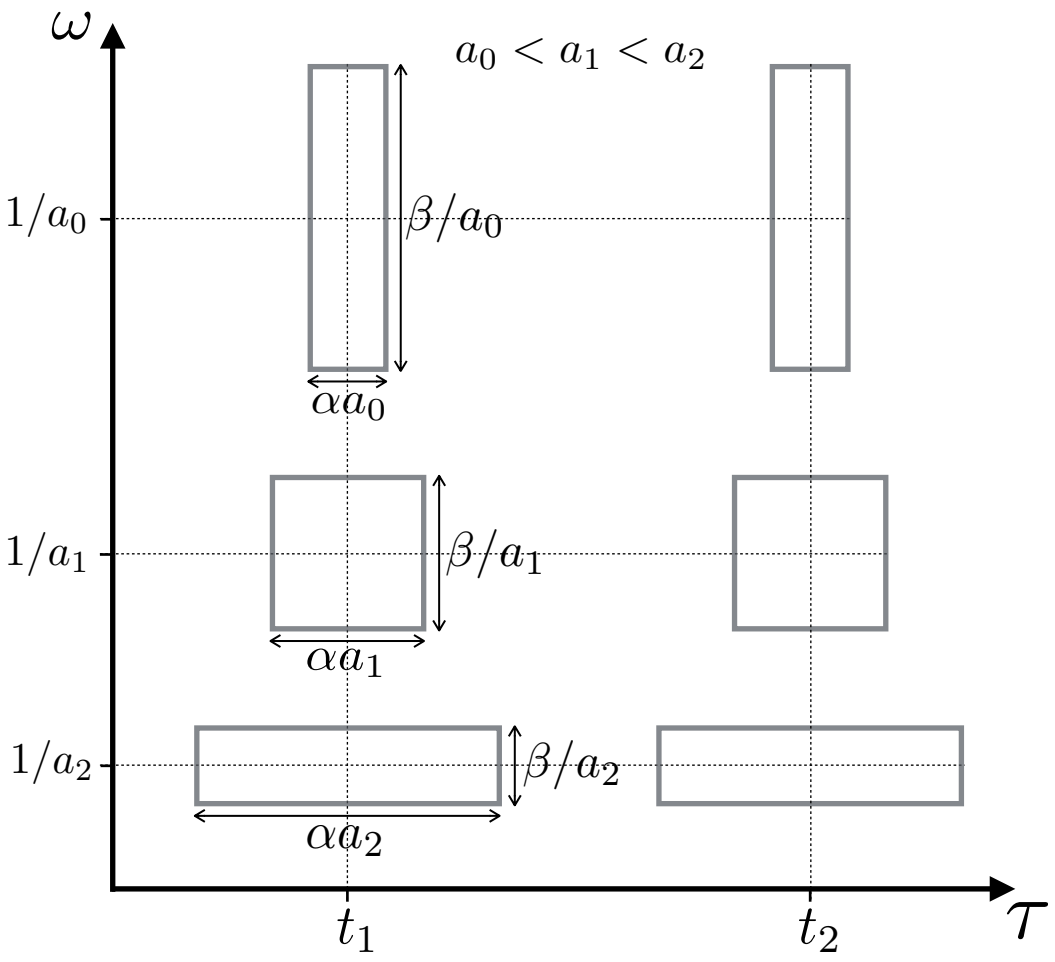

Supplement: Supplementary file 34 [file npg-2017-27-supplement.zip]

# Wavelet scalogram & 95.0 % confidence levels

## Classical algorithms

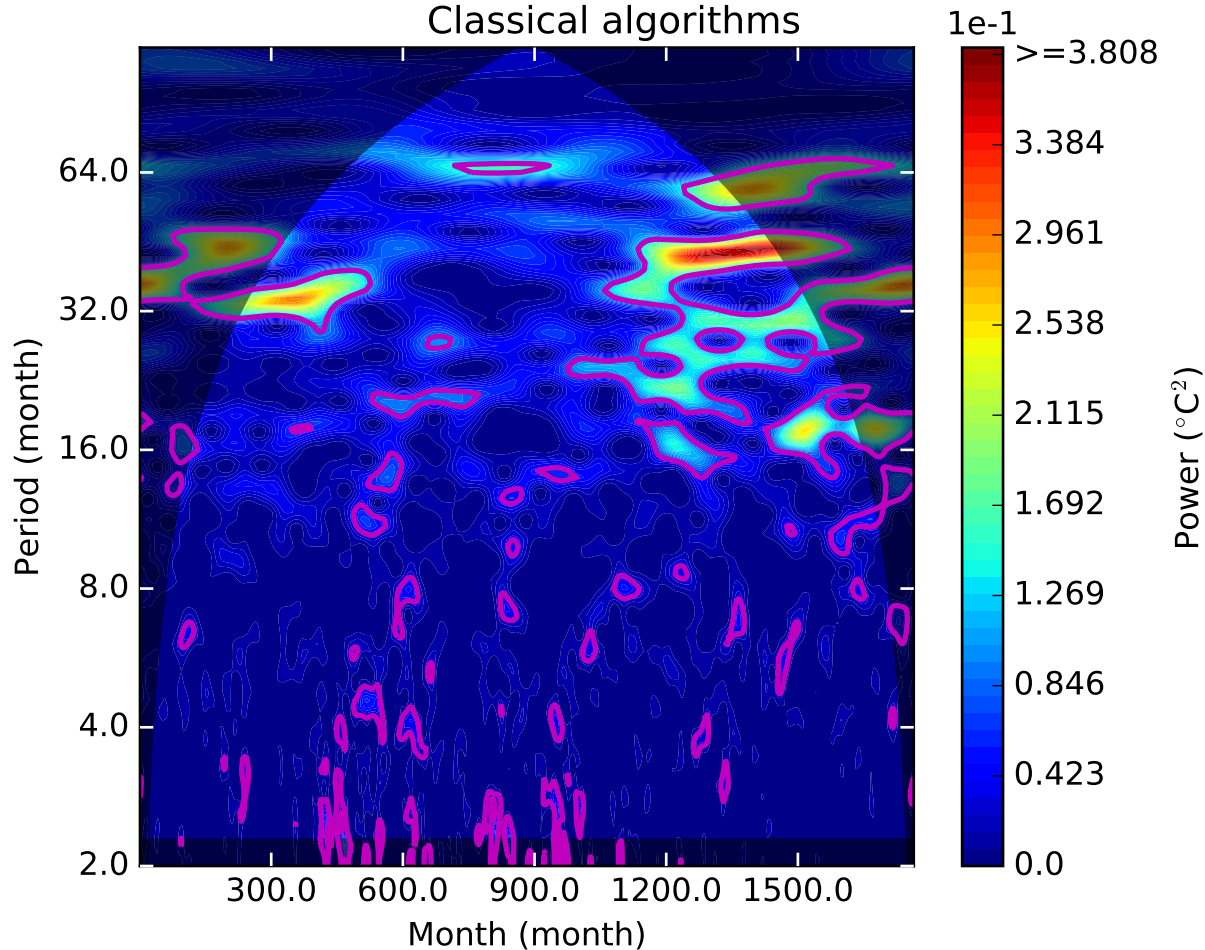

Supplement: Supplementary file 35 [file npg-2017-27-supplement.zip]

Interpolated time series with  $\Delta t = 30$  yr

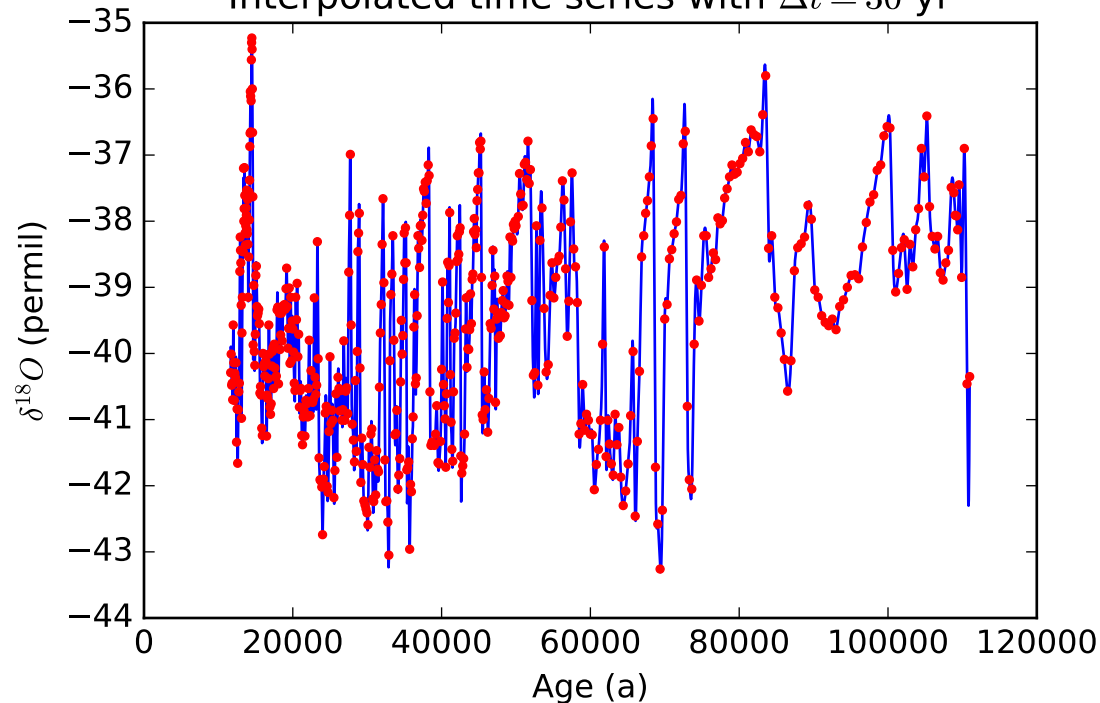

Supplement: Supplementary file 36 [file npg-2017-27-supplement.zip]

Age step in function of age

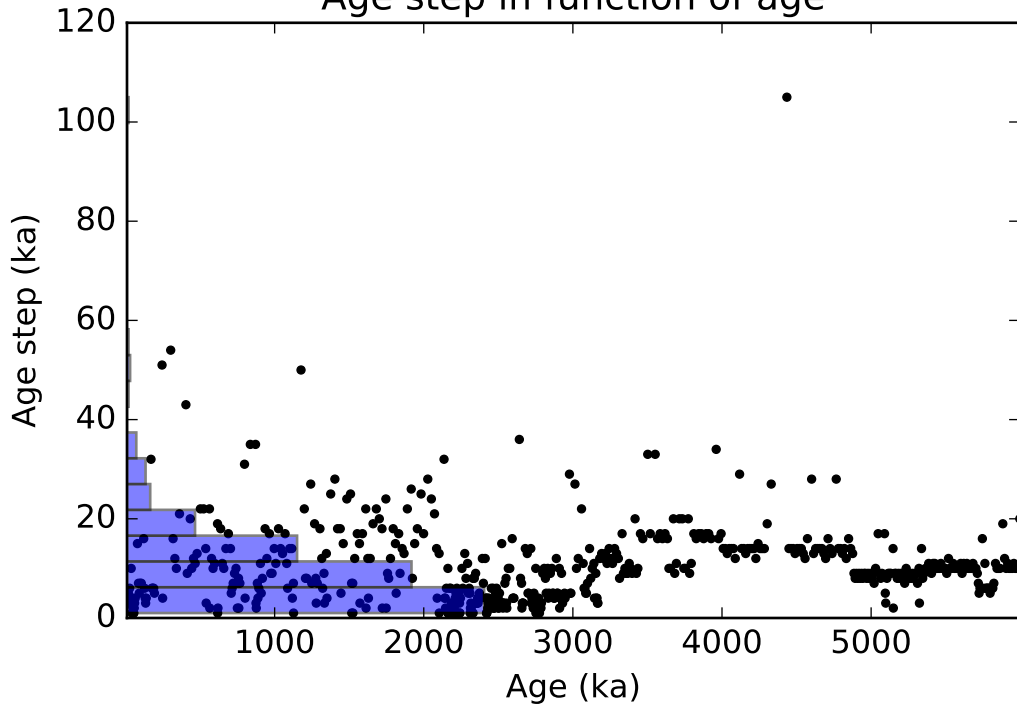

Supplement: Supplementary file 37 [file npg-2017-27-supplement.zip]

Data and trend

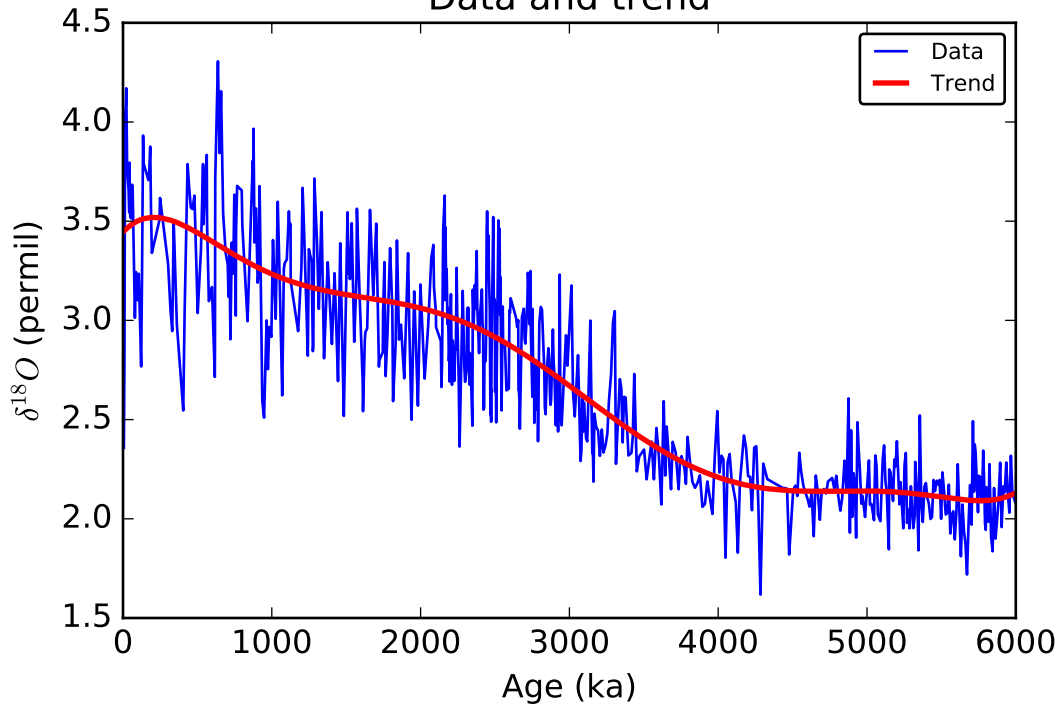

Supplement: Supplementary file 38 [file npg-2017-27-supplement.zip]

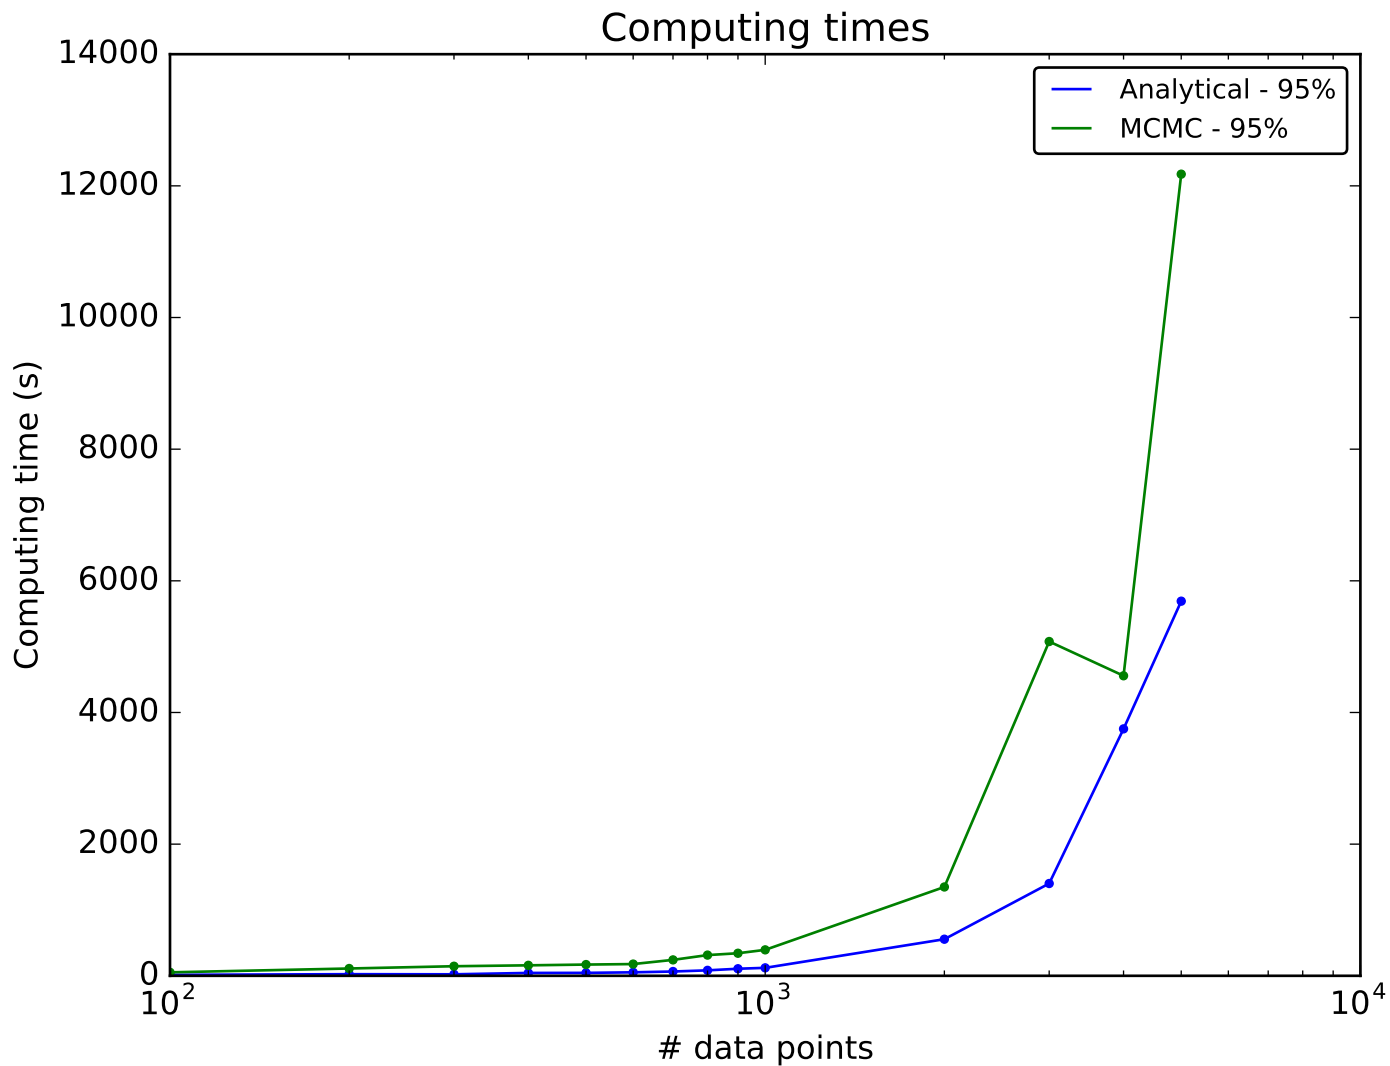

Supplement: Supplementary file 39 [file npg-2017-27-supplement.zip]
